# Supplementary material for: Synthesis of cyclopropanes through gold-catalyzed [2 + 1] cycloaddition of allenamides with sulfoxonium ylides
Source: Royal Society of Chemistry journal article supplement (doi:10.1039/d3ob00390f), 2023-01-01

## Supporting Information

for

### Synthesis of Cyclopropanes from Gold-Catalyzed [2+1] Cycloaddition of Allenamides with Sulfoxonium Ylides.

Tong Hong†, Yongchun Liu†, Kun Zhao, Song Cheng, Qingsong Liu,

Shuting Zhang, Ying Zhong, Xiaoxiao Li\* and Zhigang Zhao\*

*Key Laboratory of Basic Chemistry of the State Ethnic Commission, School  
of Chemistry and Environment, Southwest Minzu University, Chengdu*

*610041, PR China.*

[lixiaoxiao.2005@163.com](mailto:lixiaoxiao.2005@163.com)   [zzg63129@163.com](mailto:zzg63129@163.com)

#### Table of contents

|                             |        |
|-----------------------------|--------|
| 1. Control experiments..... | S2-S3  |
| 2. NMR Spectra of 3.....    | S4-S24 |
| 3. NMR Spectra of 4.....    | S25    |
| 4. NMR Spectra of 5.....    | S26    |

## 1. Control experiments

We did some control experiments to explain whether the cyclopropylidene enamide is the initial product formed in the reaction, as shown in the follow:

(1) First, we did the  $^1\text{H}$  NMR of the mixture before acidic hydrolysis to see whether the cyclopropylidene enamide is generated in the reaction system. The ratio of the yield of the aldehyde and the cyclopropylidene enamide is 1.8:1 through the  $^1\text{H}$  NMR of the mixture. After acidic hydrolysis, the cyclopropylidene enamide is not left in the mixture.

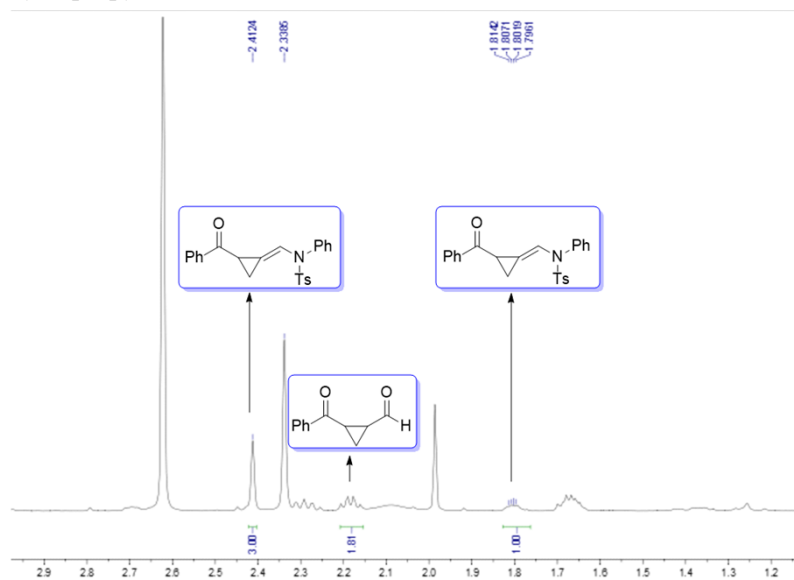

(2) We tried to isolate the cyclopropylidene enamide independently using Maulide's procedure (Chem. Eur. J. 2014, 20, 10636), however, the cyclopropylidene enamide is highly instable, we can't afford the cyclopropylidene enamide, the  $^1\text{H}$  NMR of the isolated product showed that the cyclopropylidene enamide is not stable using whether acidic silica gel or basic alumina.

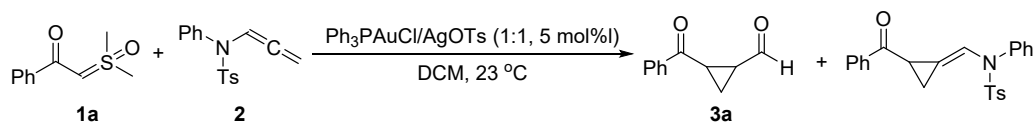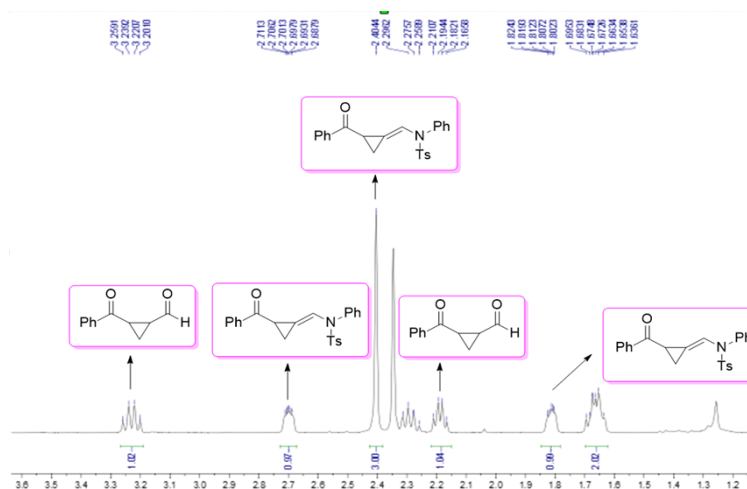

(3) The dr value is 4:1 before acidic hydrolysis, and the dr value increased to 10:1 after acidic hydrolysis.

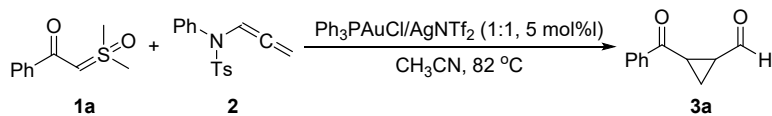

Figure 1:  $^1\text{H}$  NMR of the mixture after acidic hydrolysis

Figure 2:  $^1\text{H}$  NMR of the mixture before acidic hydrolysis

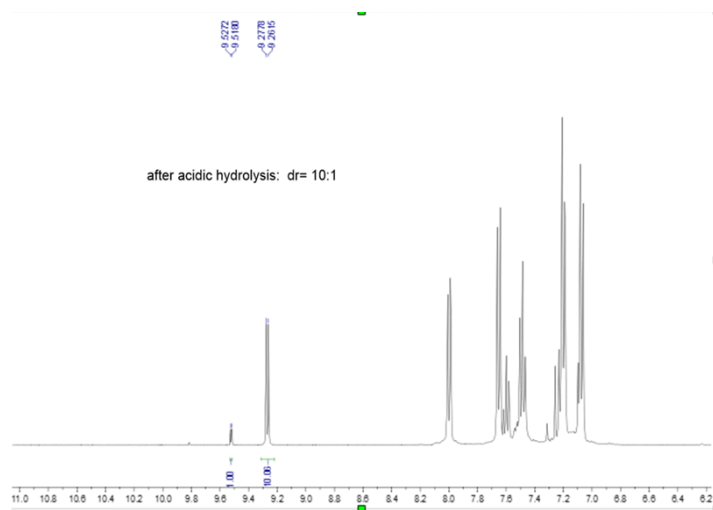

Figure 1

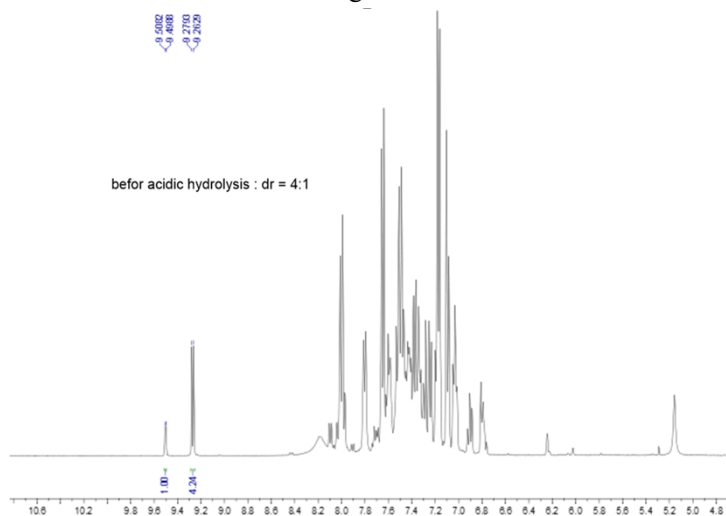

Figure 2

## 2. NMR Spectra of 3

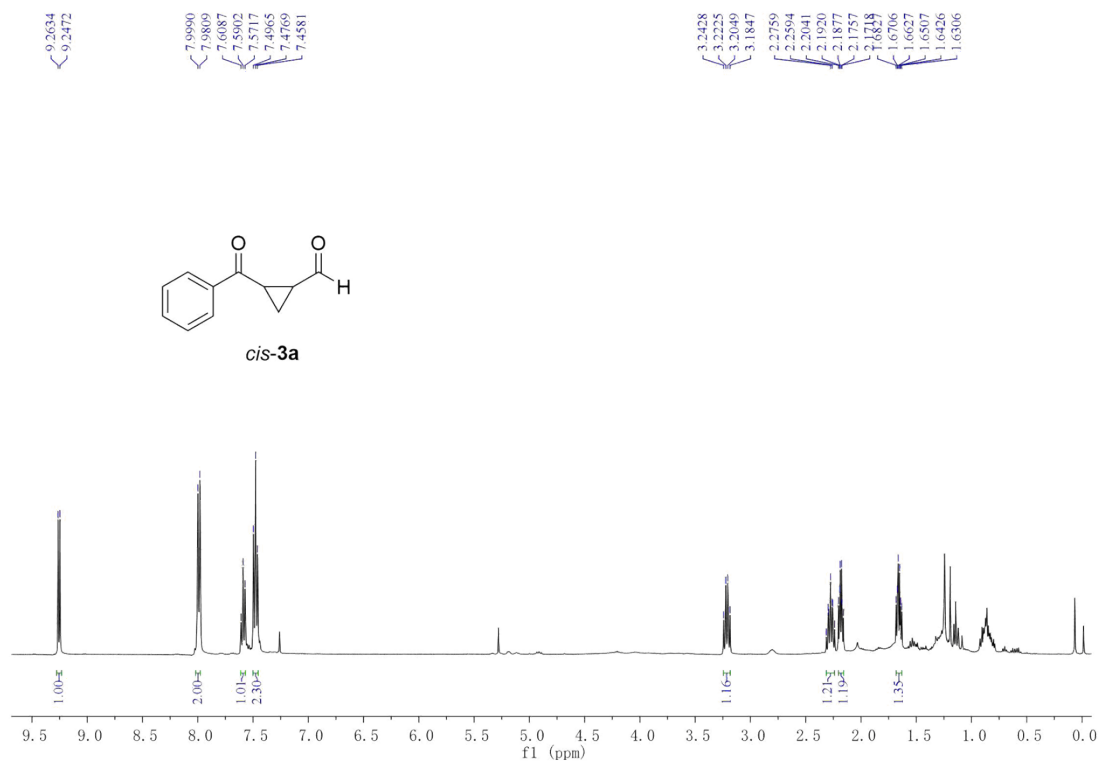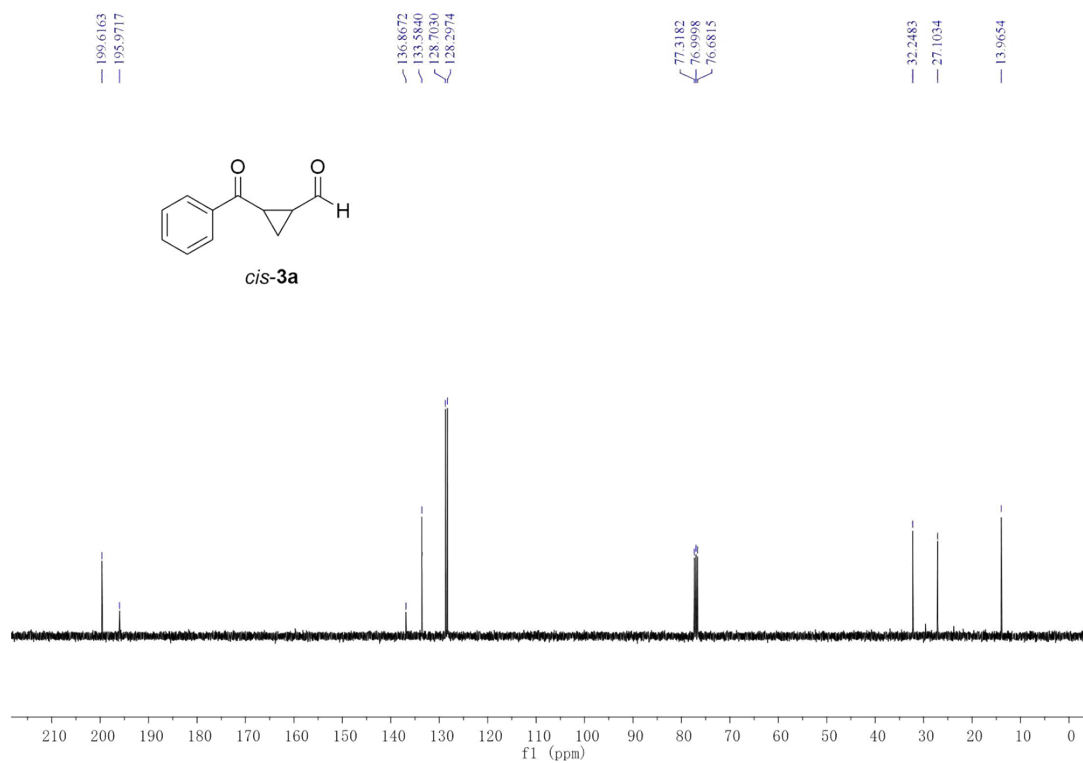



9.5555  
9.5466

8.0139  
7.9959  
7.6275  
7.6090  
7.5905  
7.5172  
7.4975  
7.4789  
7.2603

3.3301  
3.3206  
3.3184  
3.3082  
3.2983  
3.2901  
3.2839  
3.2844

2.6867  
2.6726  
2.6650  
2.6510  
1.8146  
1.8091  
1.8019  
1.8002  
1.7932  
1.7877  
1.785  
1.6929  
1.6836  
1.6786  
1.6709  
1.6621  
1.6571  
1.6478

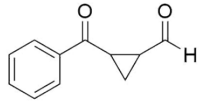

*trans-3a*

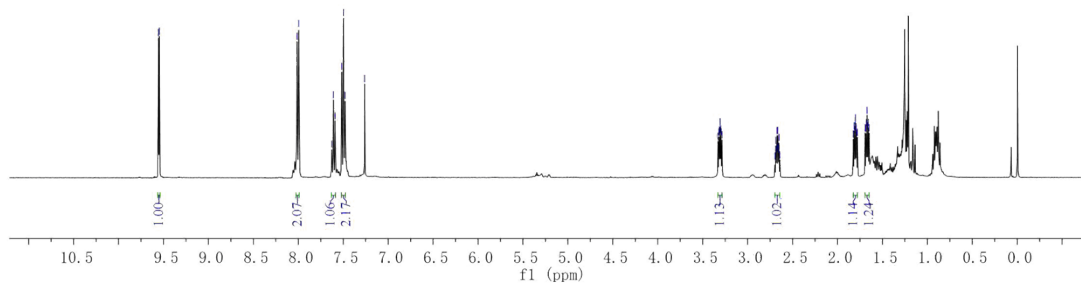

198.7241  
196.1412

136.7957  
133.5581  
128.7365  
128.2357

77.3138  
76.6959  
76.6780

32.8237  
26.0388  
17.6493

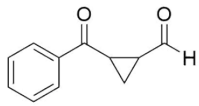

*trans-3a*

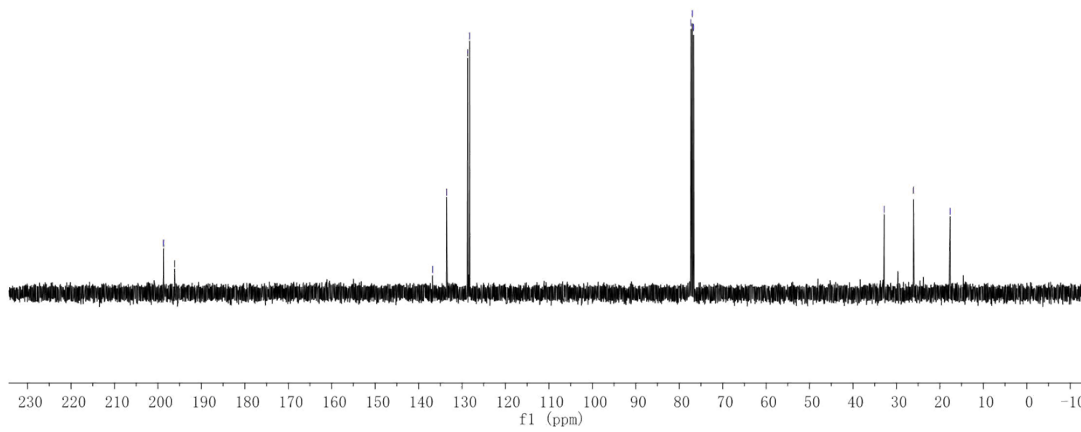

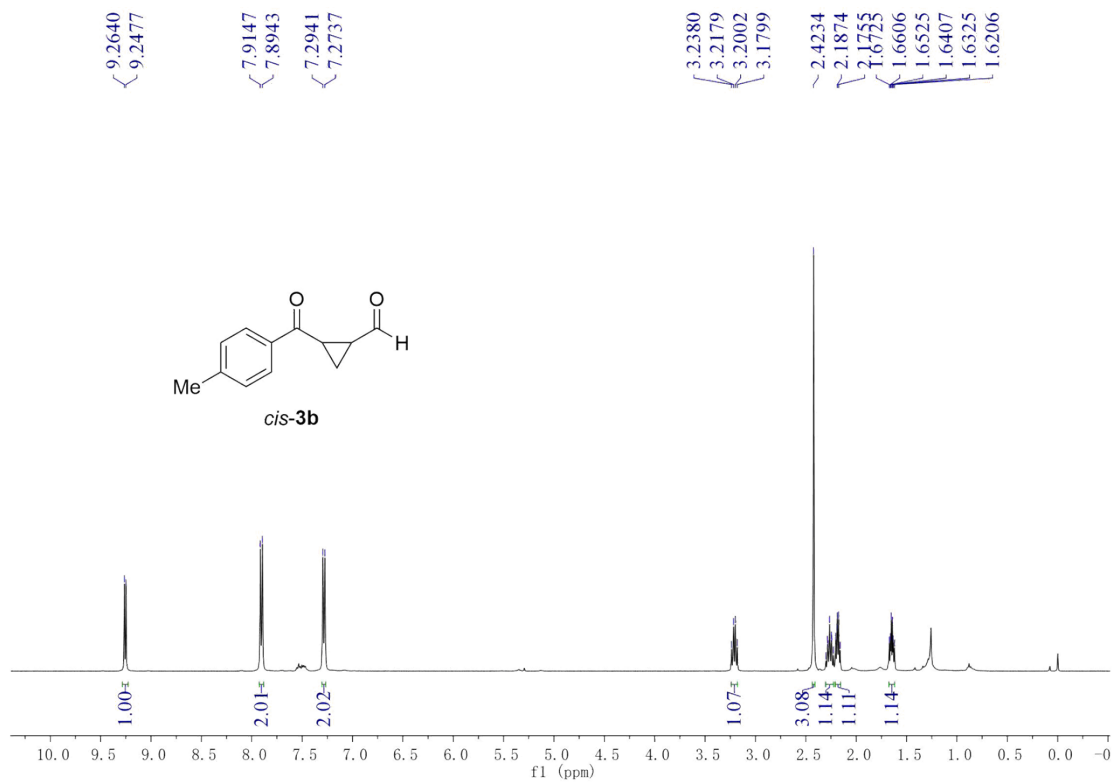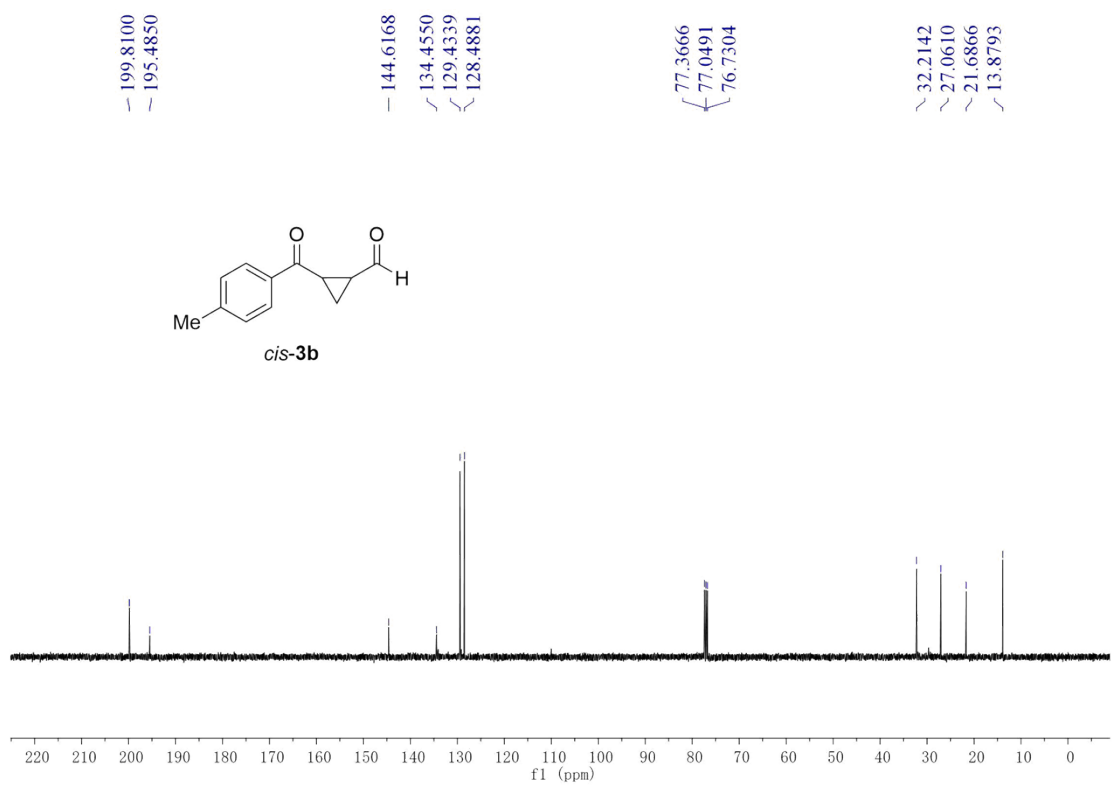

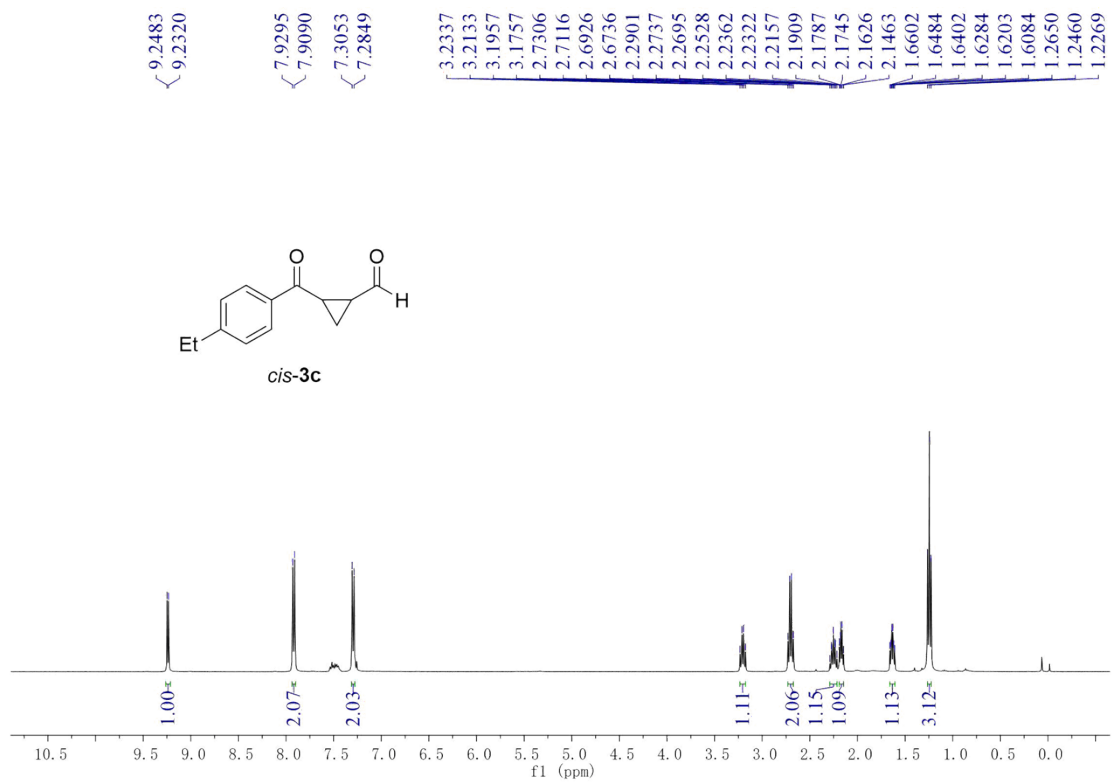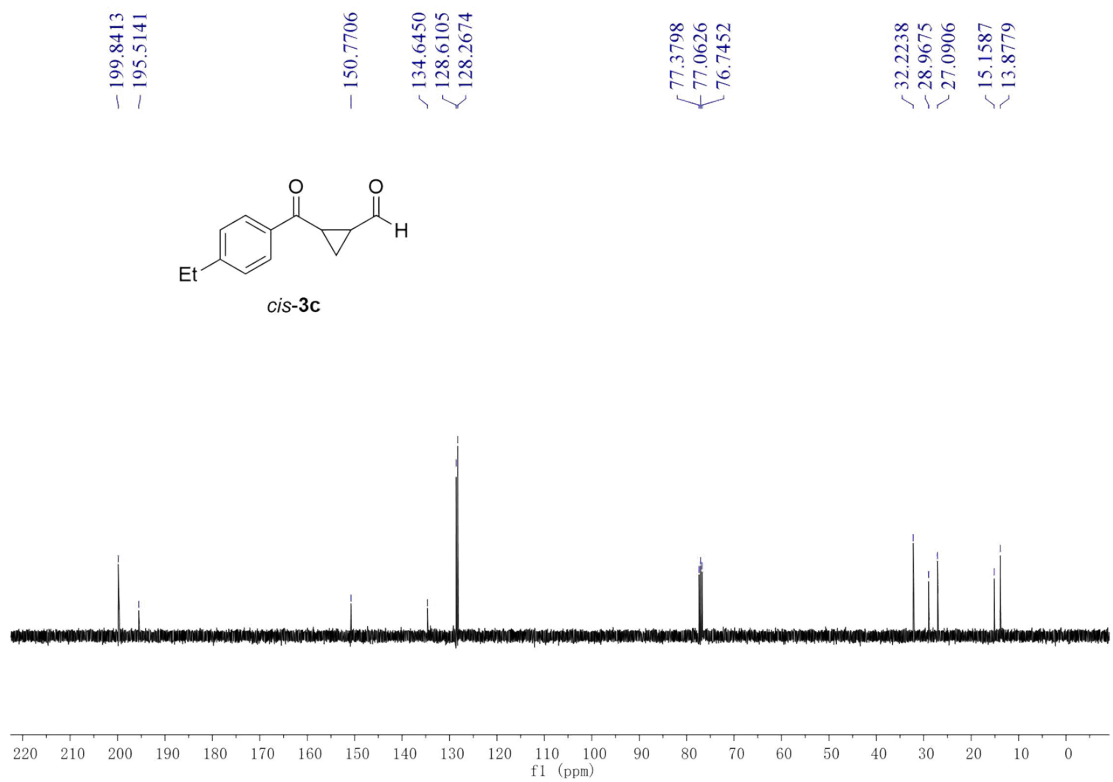

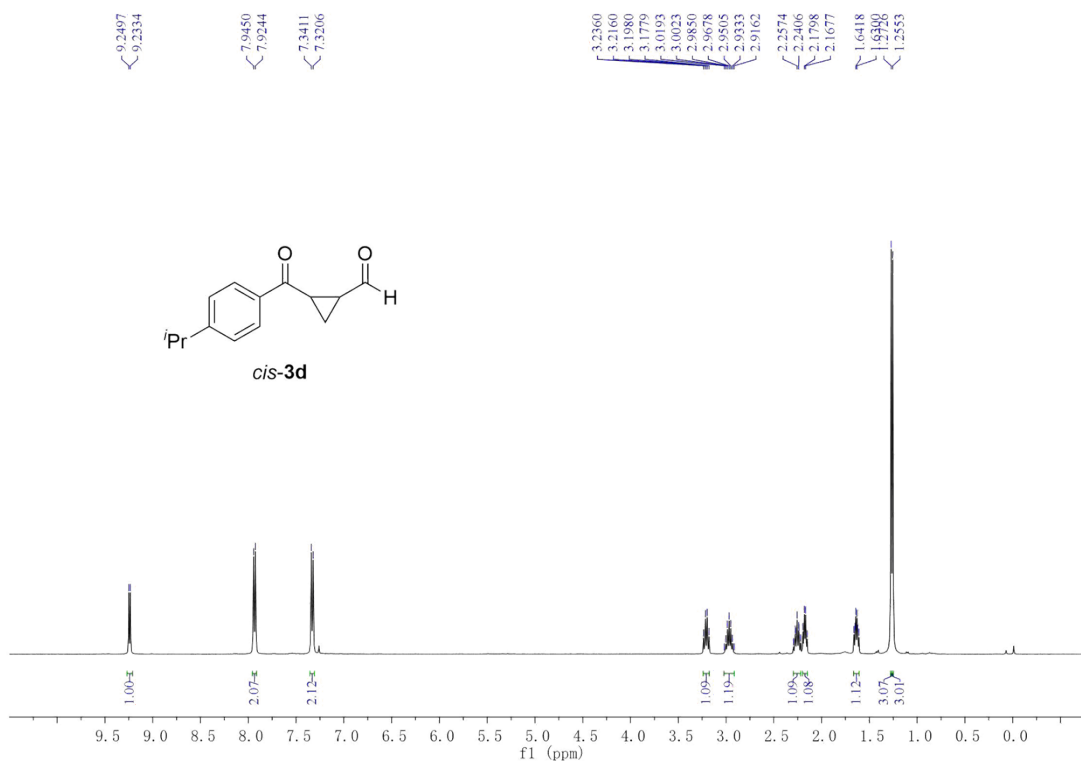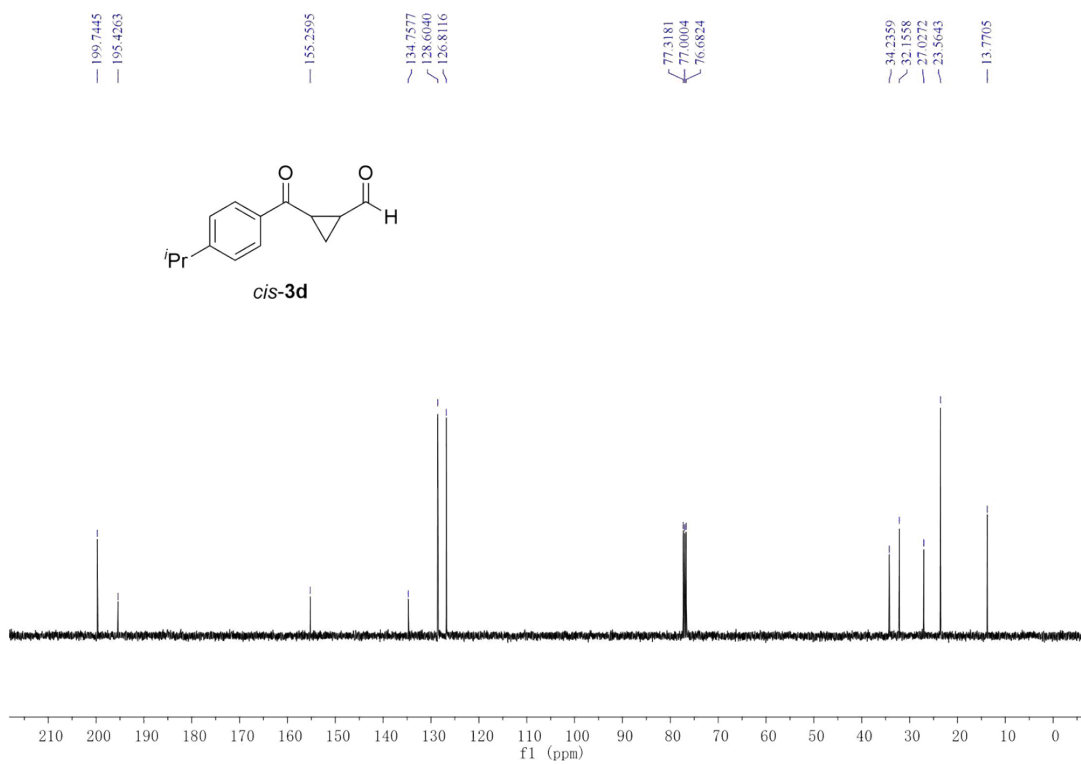

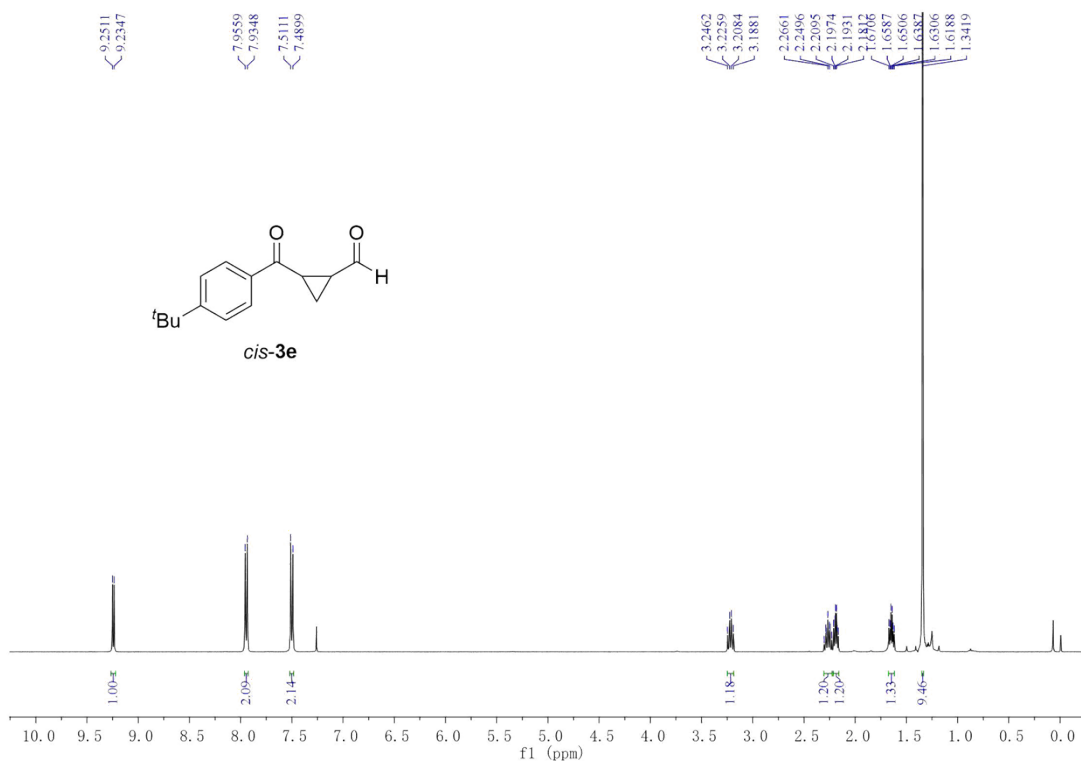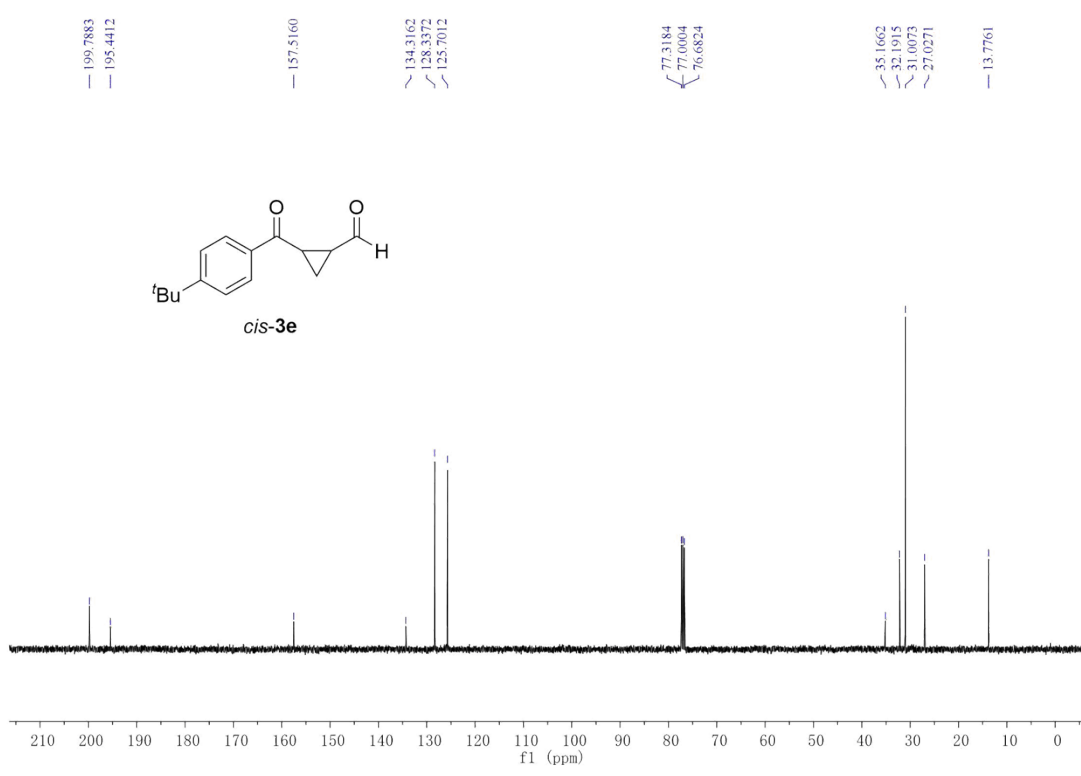

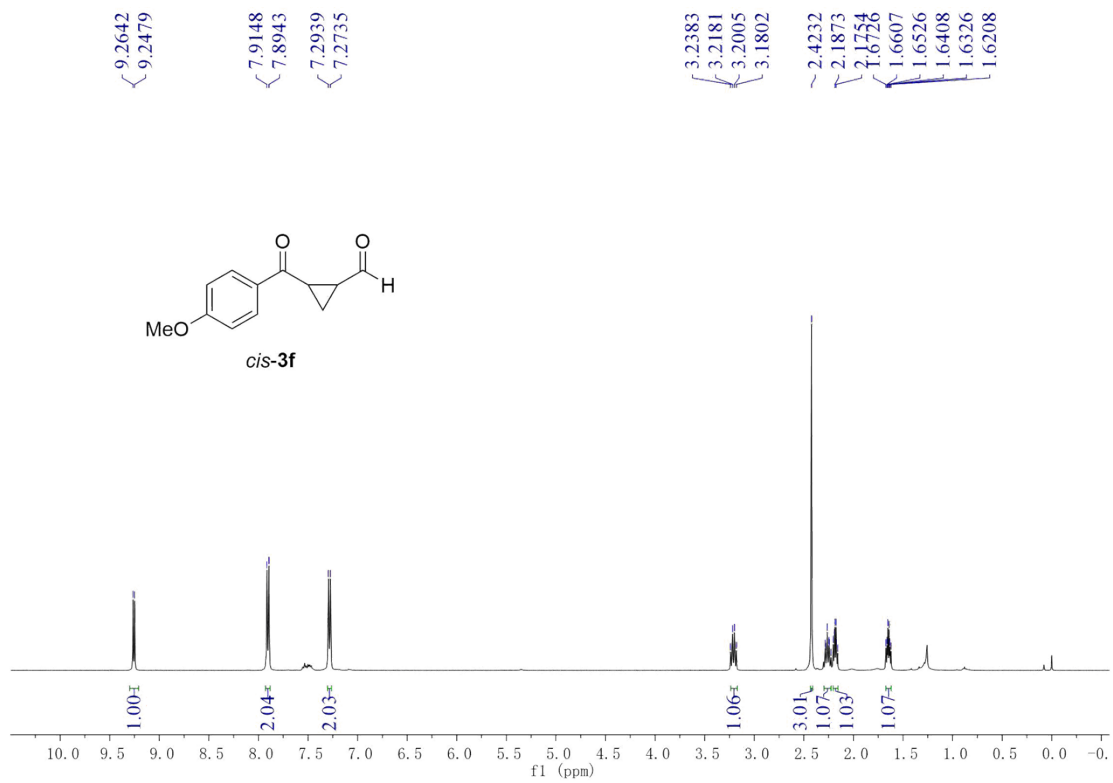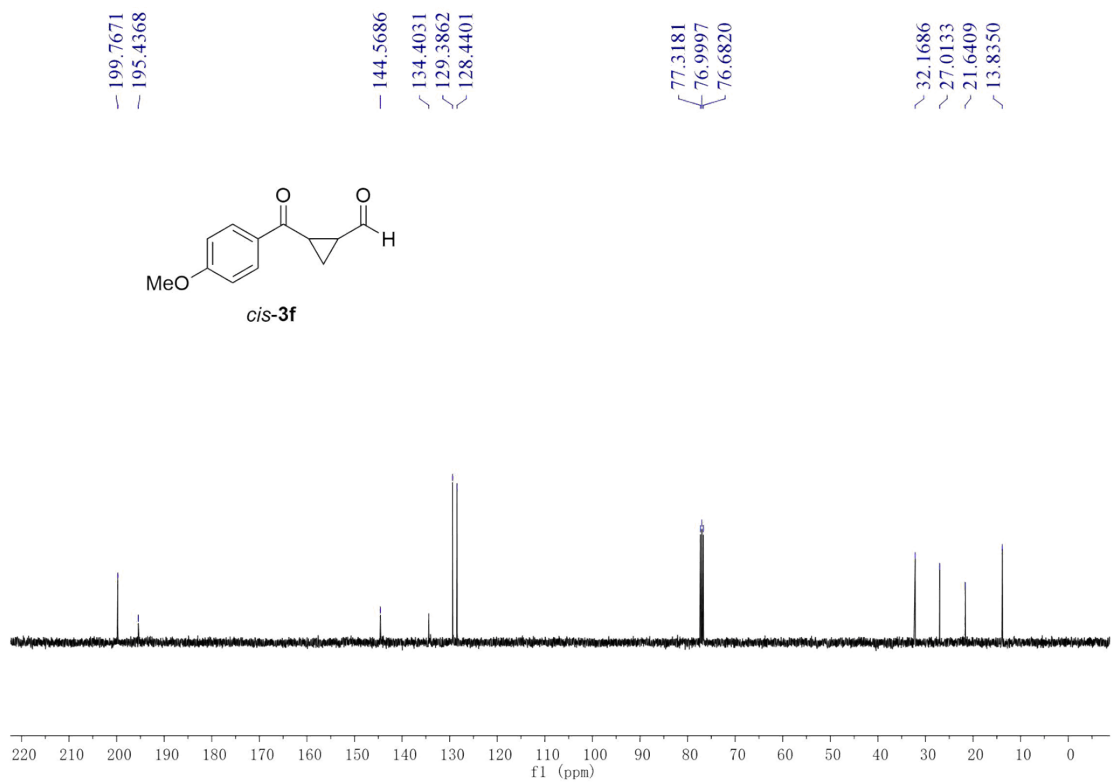

9.5825  
9.5741

7.9579  
7.9366  
7.4863  
7.4650  
7.2625

3.2730  
3.2633  
3.2585  
3.2503  
3.2421  
3.2372  
3.2276

2.6856  
2.6773

1.8078  
1.8026  
1.7942  
1.7864  
1.6996  
1.6902  
1.6852  
1.6772  
1.6691  
1.6640  
1.6546

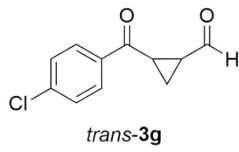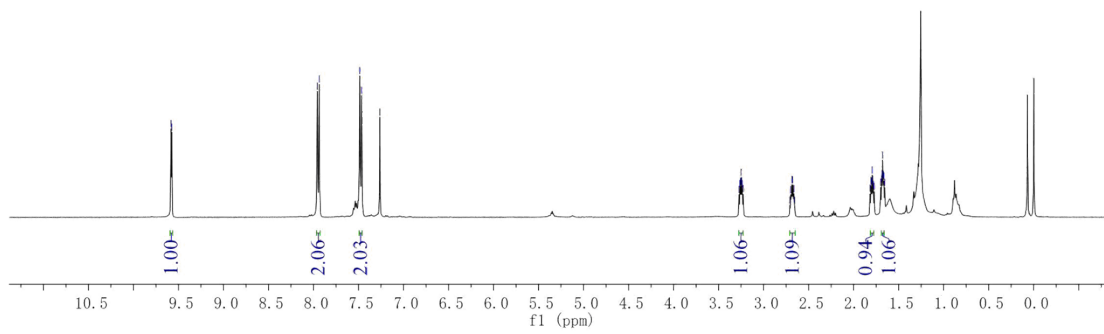

198.5516  
194.9825

140.1405  
135.0831  
129.6291  
129.0834

77.3095  
76.9916  
76.6743

32.8274  
25.9946  
17.9220

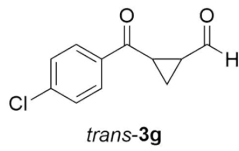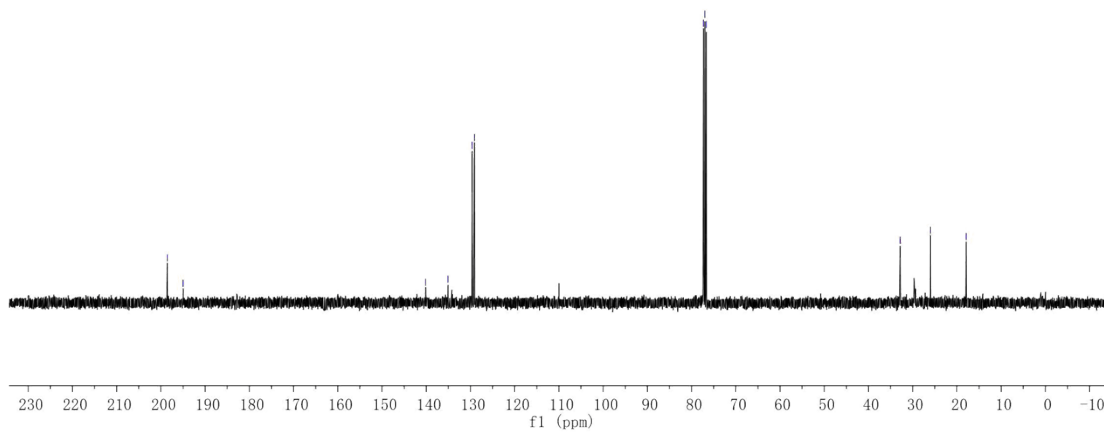

9.5832  
9.5747

7.8805  
7.8591  
7.6559  
7.6345  
7.2641

3.2598  
3.2548  
3.2469  
3.2384  
3.2333

2.6880  
2.6798  
1.8092  
1.8039  
1.7955  
1.7877  
1.7824  
1.6937  
1.6885  
1.6809  
1.6722  
1.6671

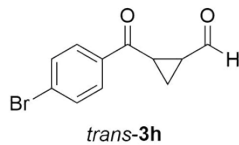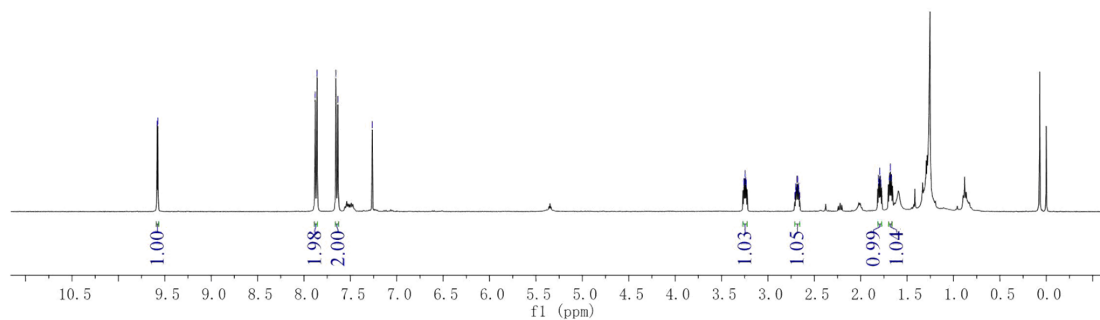

198.5632  
195.2023

135.4782  
132.0815  
129.7178  
128.8869

77.3175  
76.9997  
76.6822

32.8540  
25.9781  
17.9668

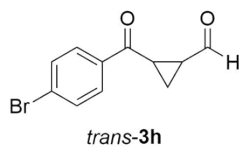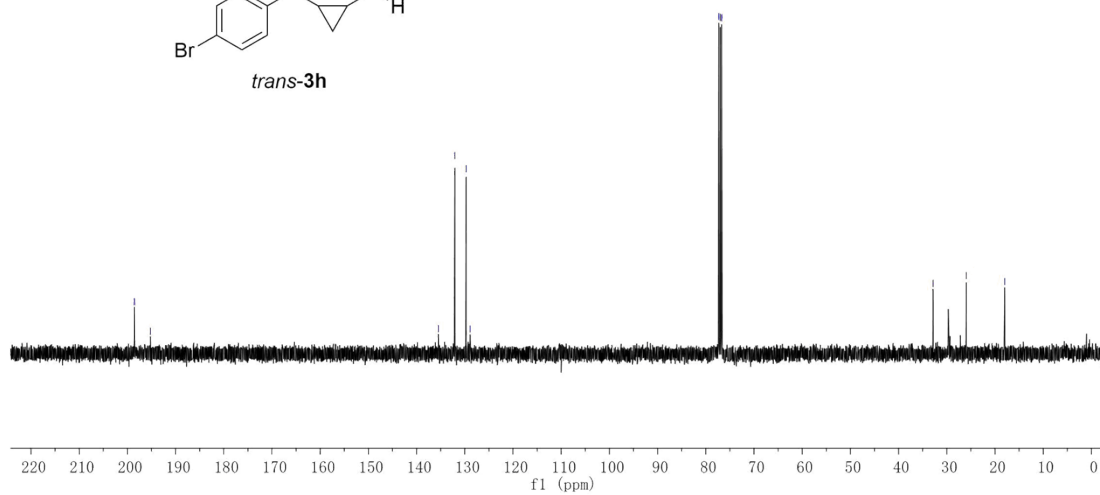



9.6087  
9.6008

8.0936  
8.0730  
7.8131  
7.7925

7.2580

3.2884  
3.2788  
3.2739  
3.2657  
3.2575  
3.2526  
3.2430

2.7424  
2.7385  
2.7202  
2.7062  
1.8302  
1.8252  
1.8167  
1.8087  
1.8036  
1.7942  
1.7409  
1.7315  
1.7263  
1.7185  
1.7101  
1.7050  
1.6956

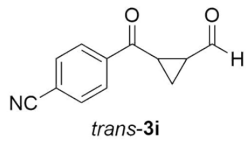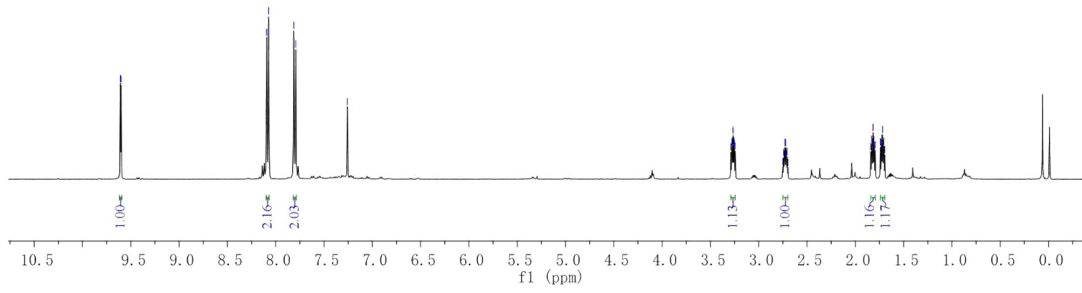

198.2013  
195.1630

139.6726  
132.6136  
128.6412

117.7469  
116.8073

77.3278  
77.0096  
76.6924

33.1037  
26.2708  
18.4510

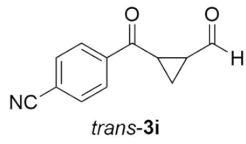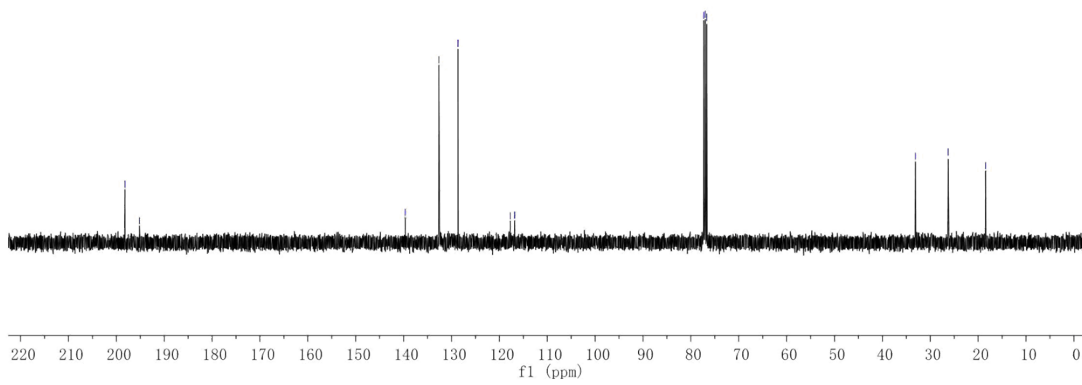

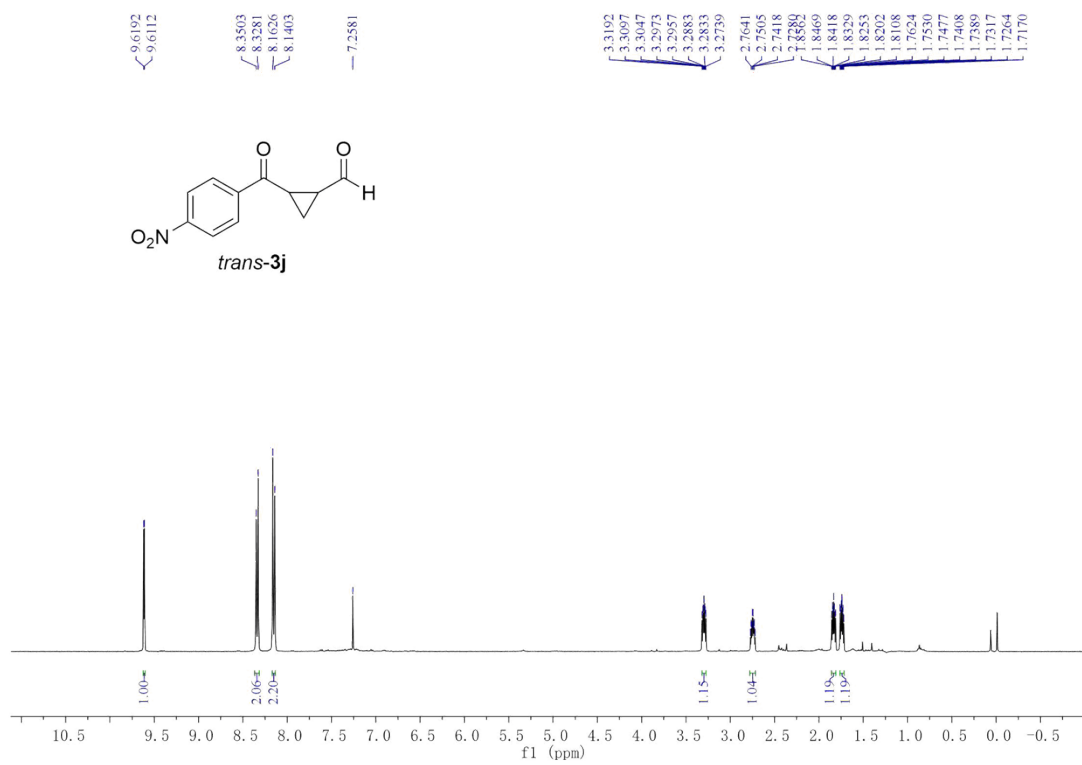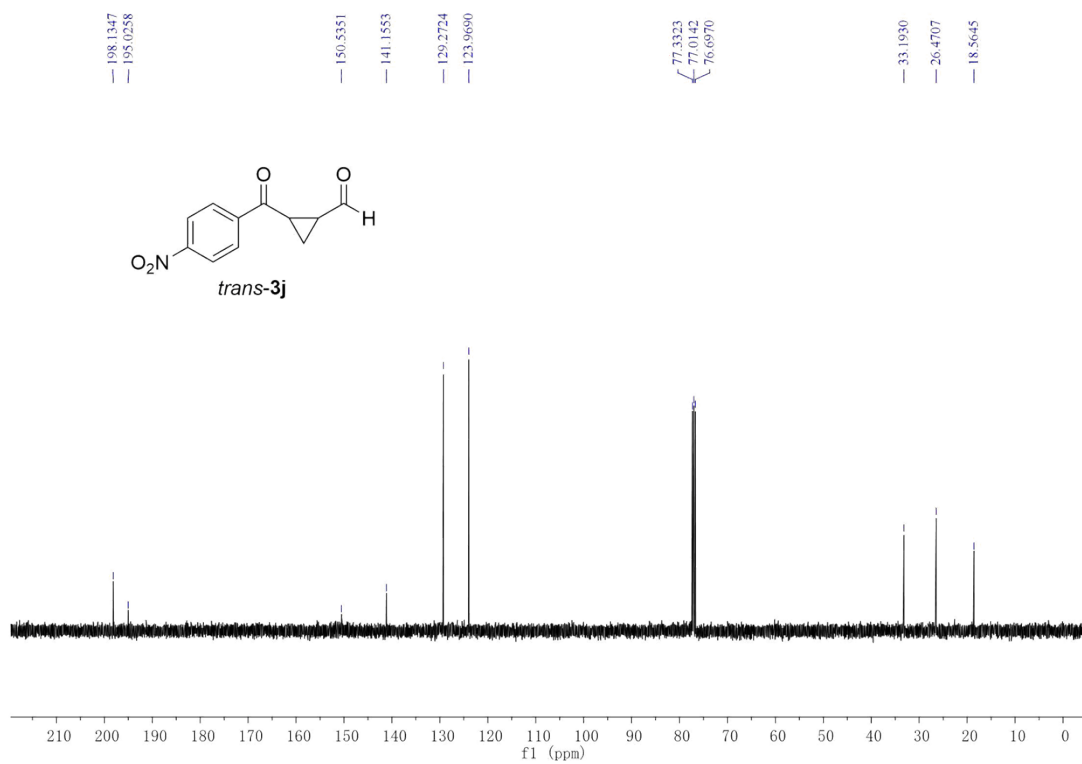

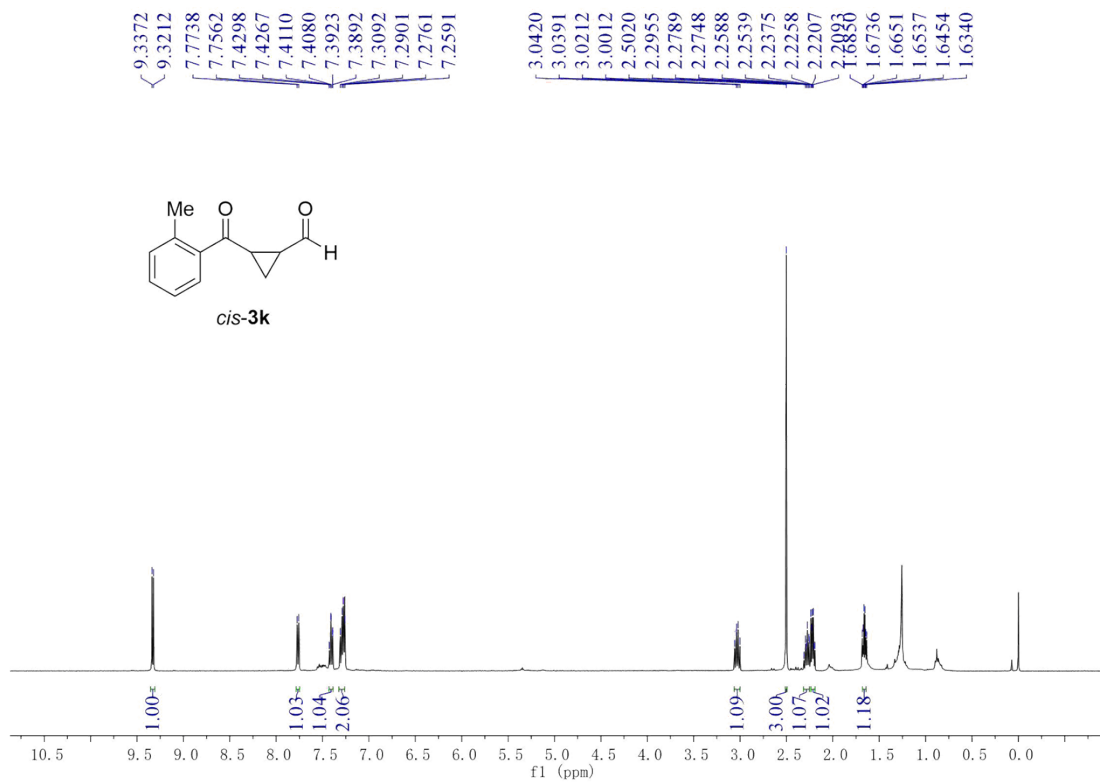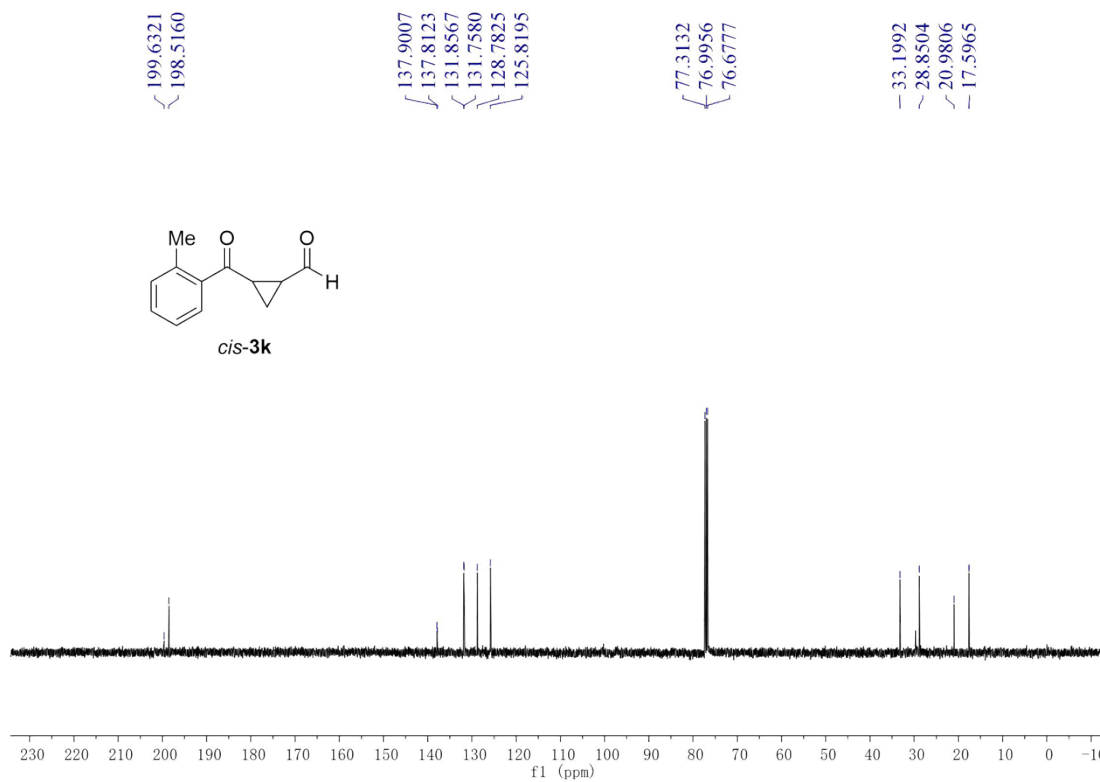

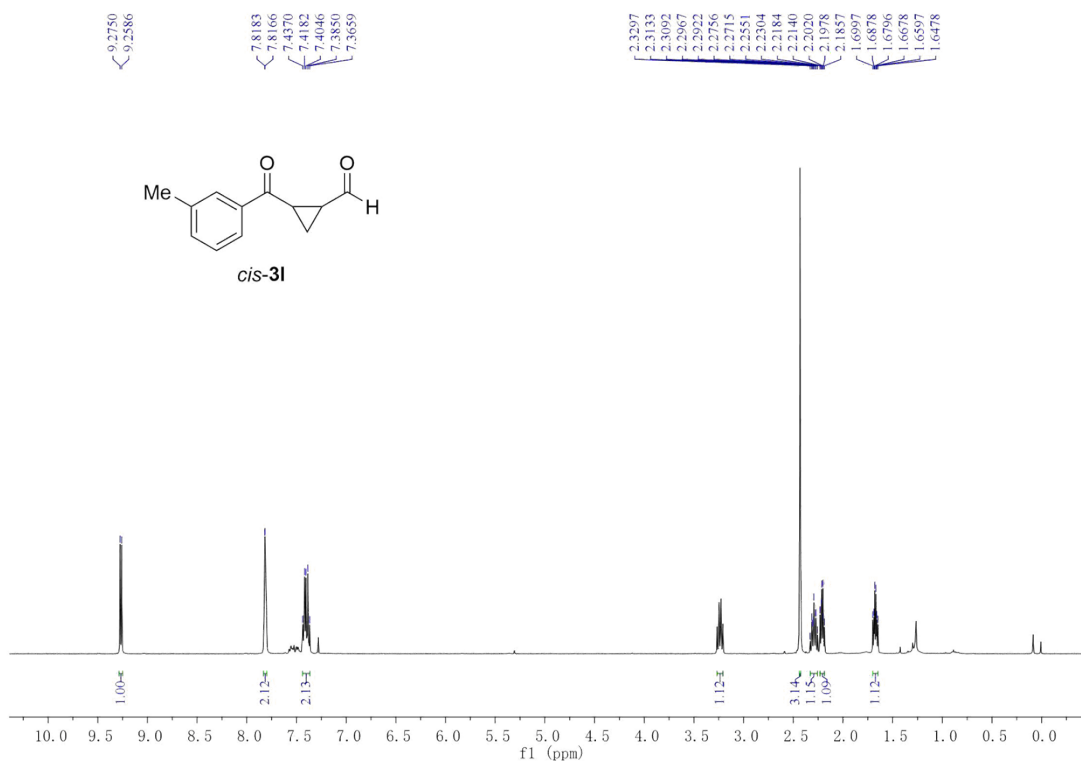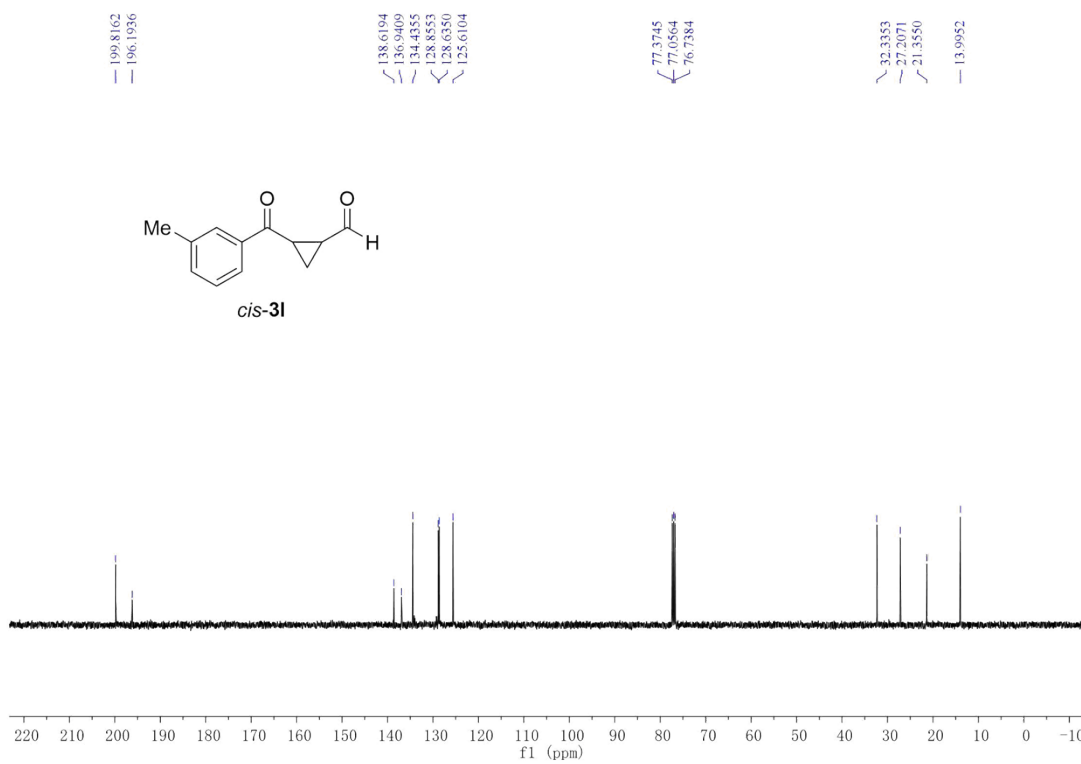

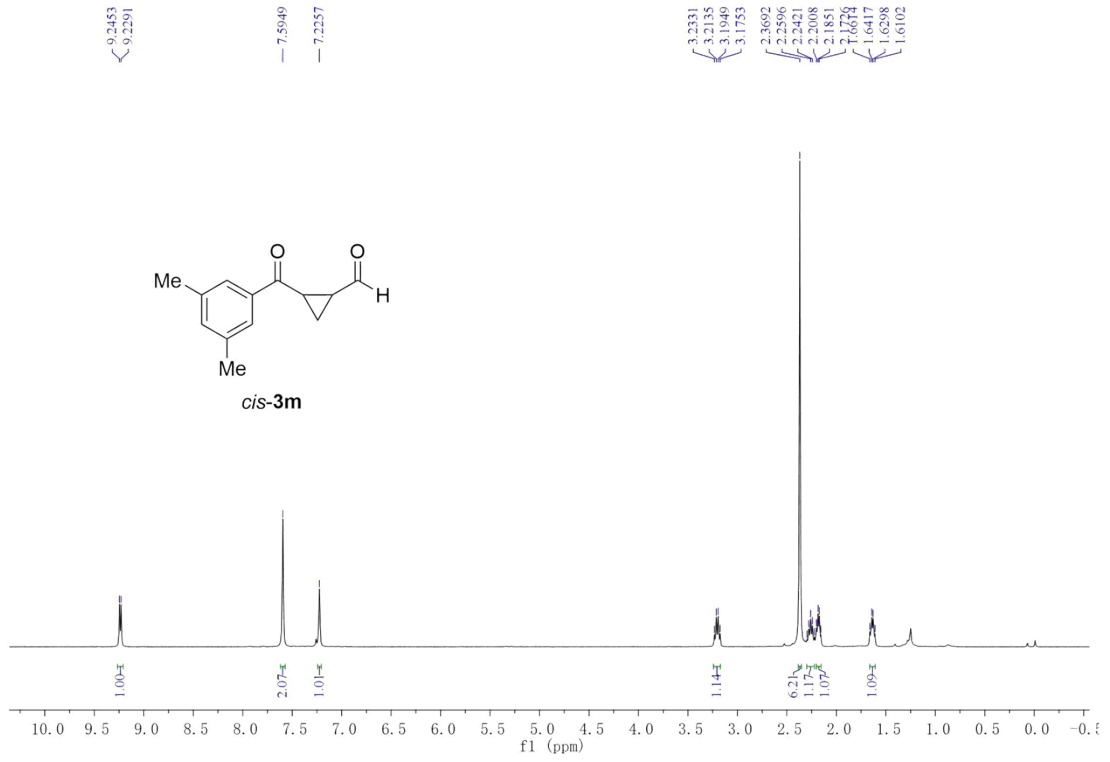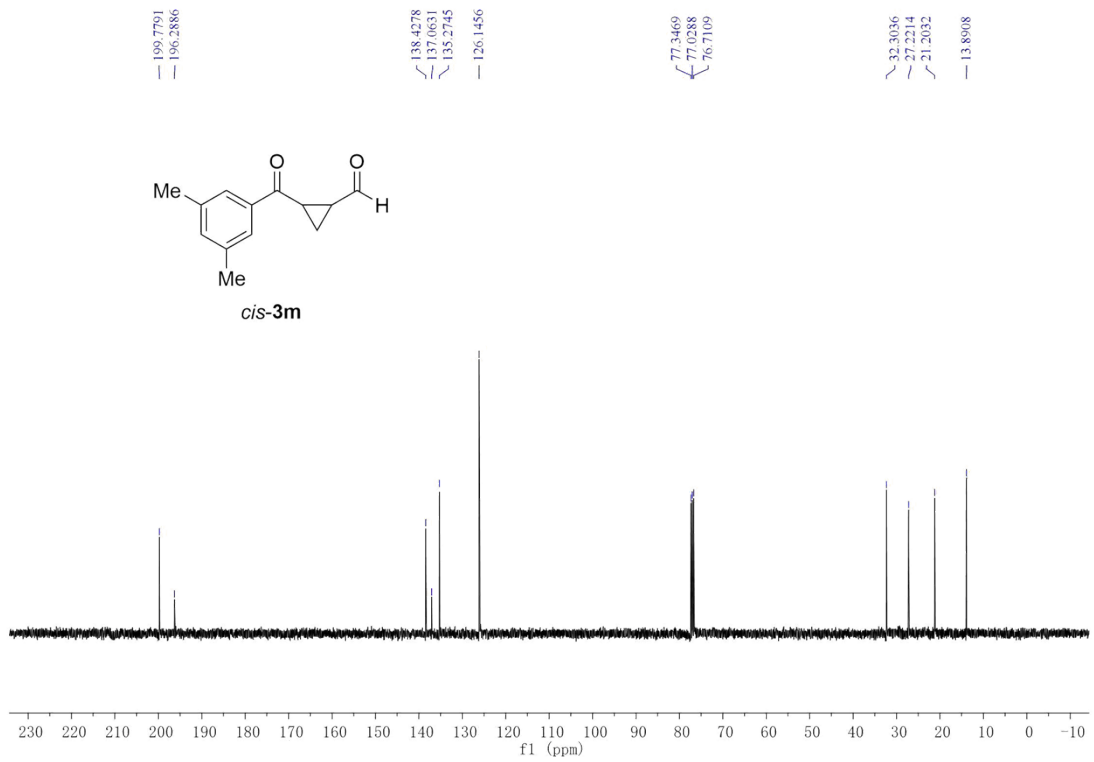

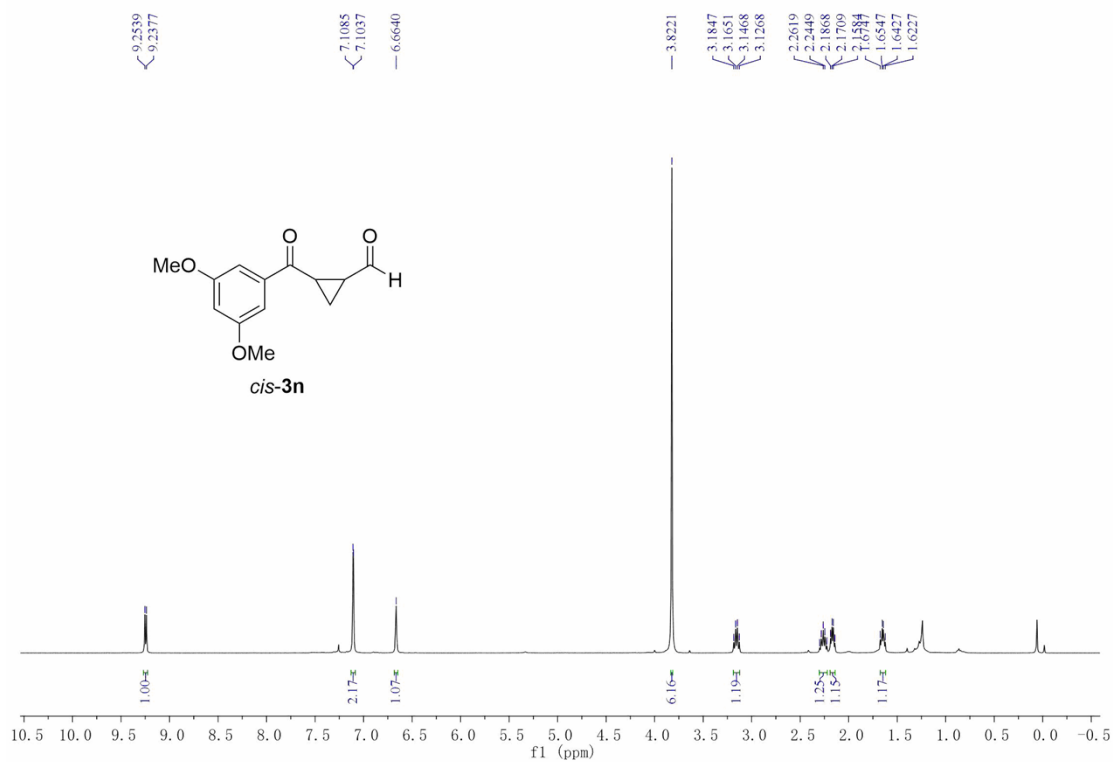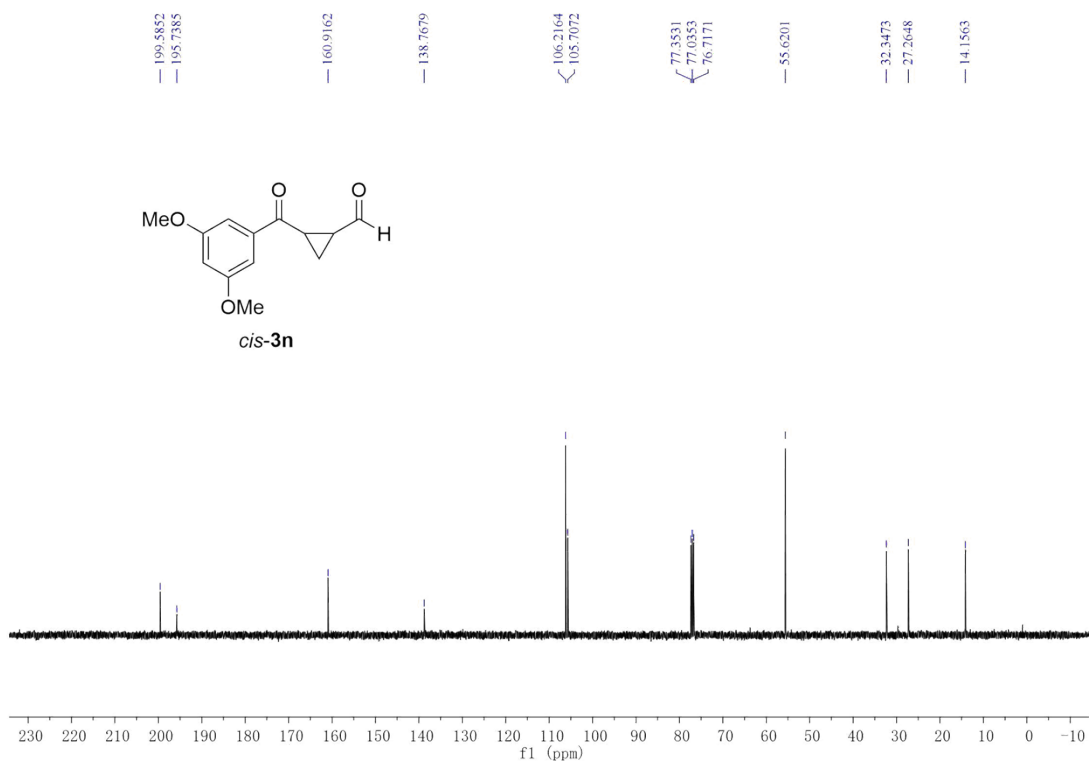

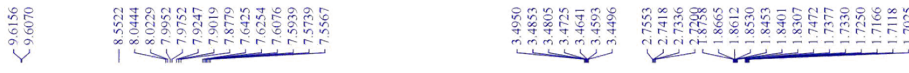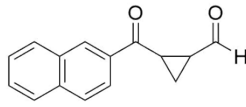

*trans-3o*

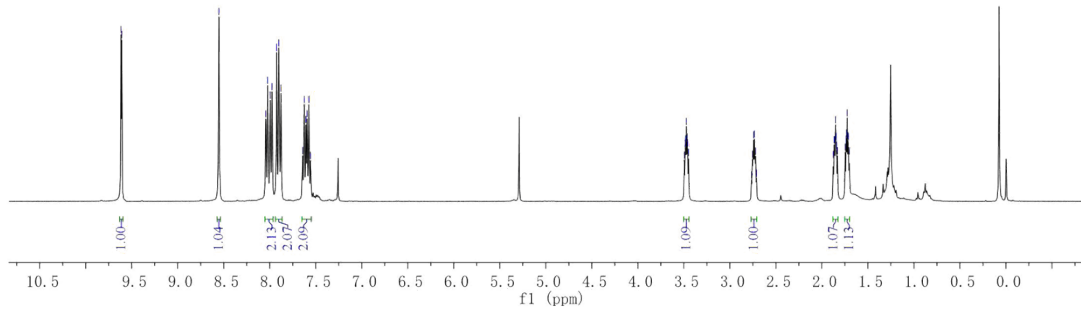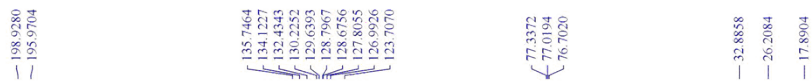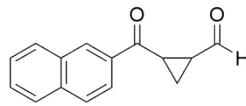

*trans-3o*

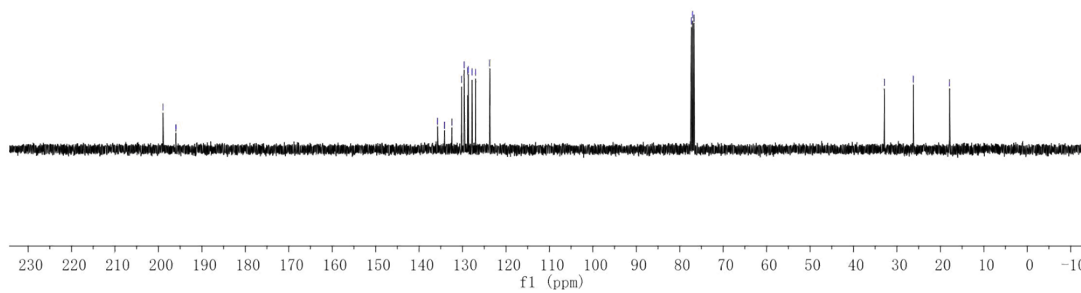

9.3553  
9.3393

7.6352  
7.6328  
7.2790  
7.2700

6.5892  
6.5852  
6.5804  
6.5762

3.1991  
3.1788  
3.1612  
3.1411

2.2253  
2.1942  
2.1829  
2.1775  
2.1658

1.6614  
1.6530  
1.6417  
1.6332  
1.6219

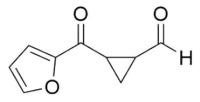

**cis-3p**

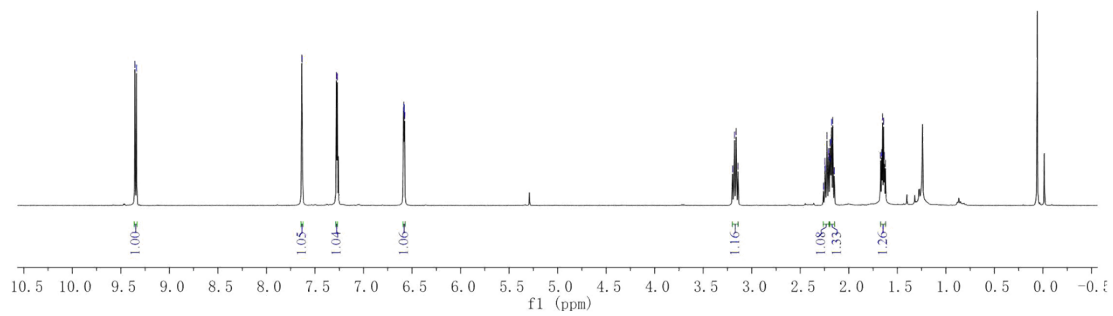

199.7391

184.6293

152.7626

147.1039

118.0420

112.7114

77.3345  
77.0167  
76.6983

32.5148

26.5827

14.1309

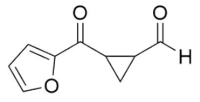

**cis-3p**

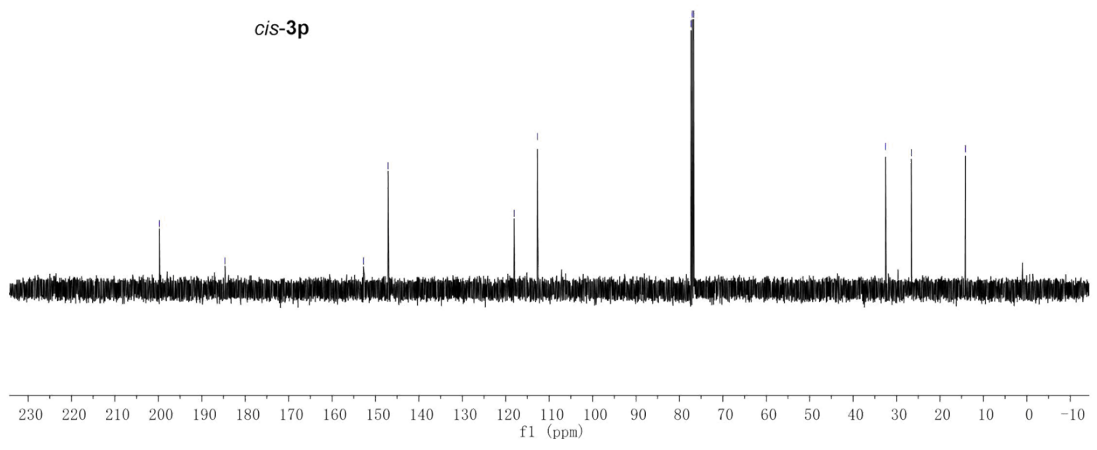



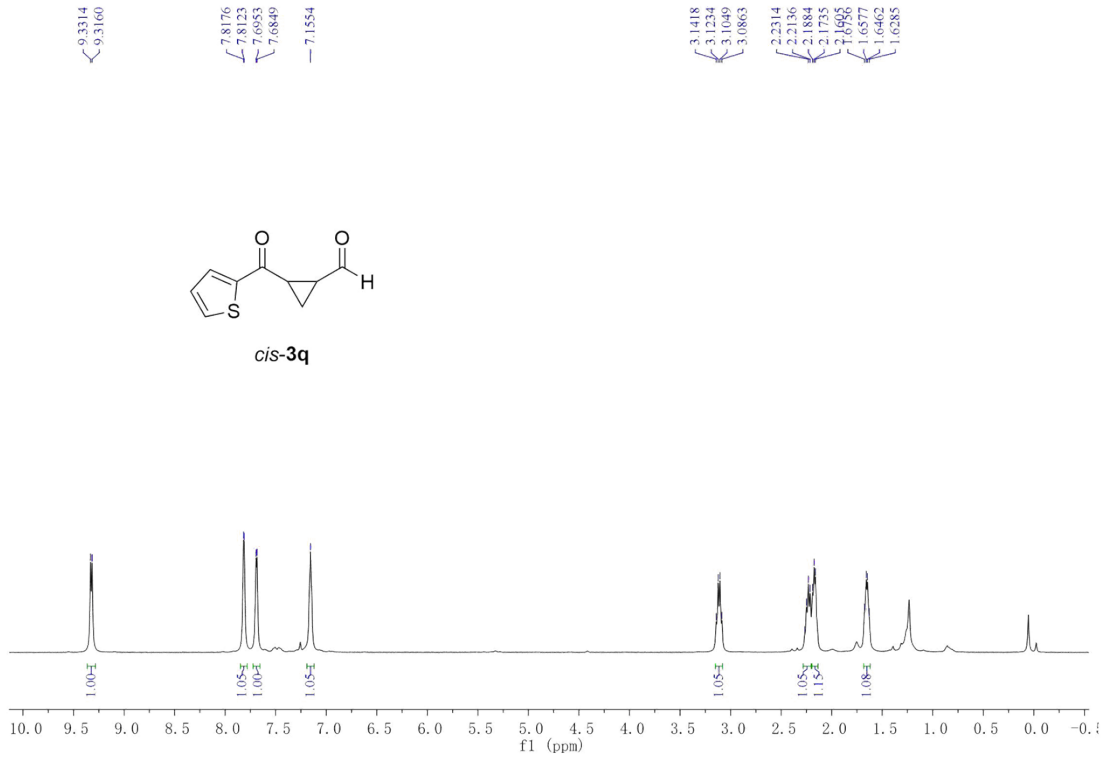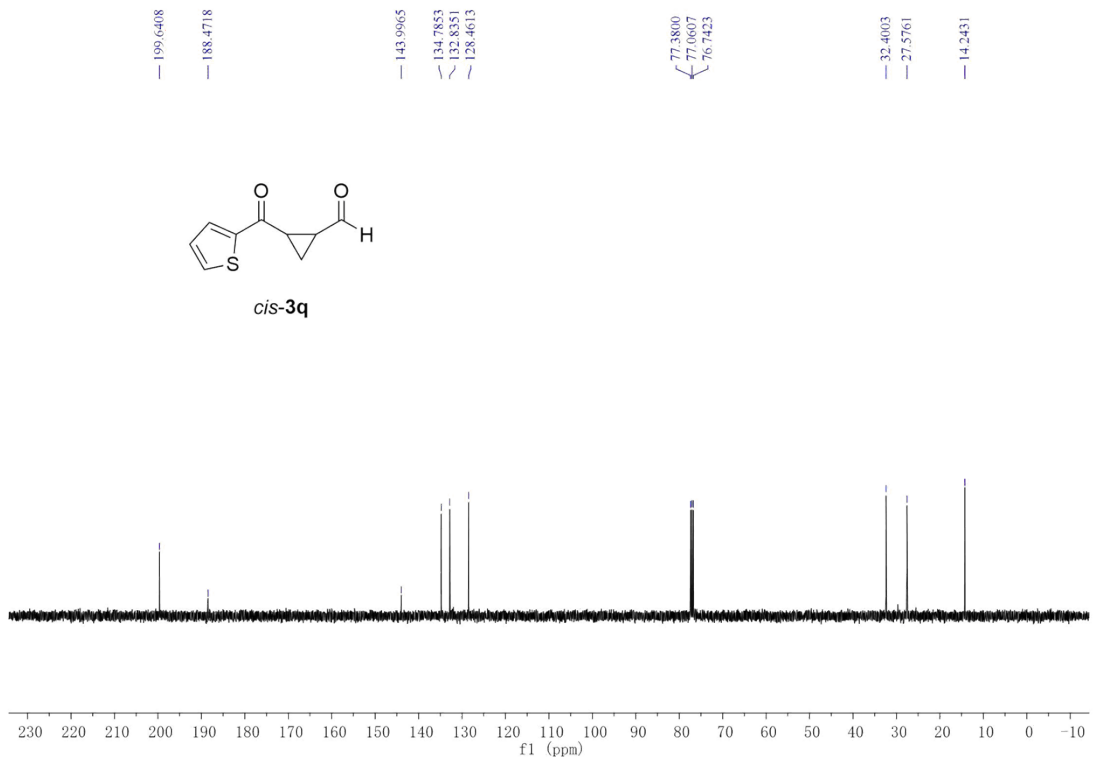

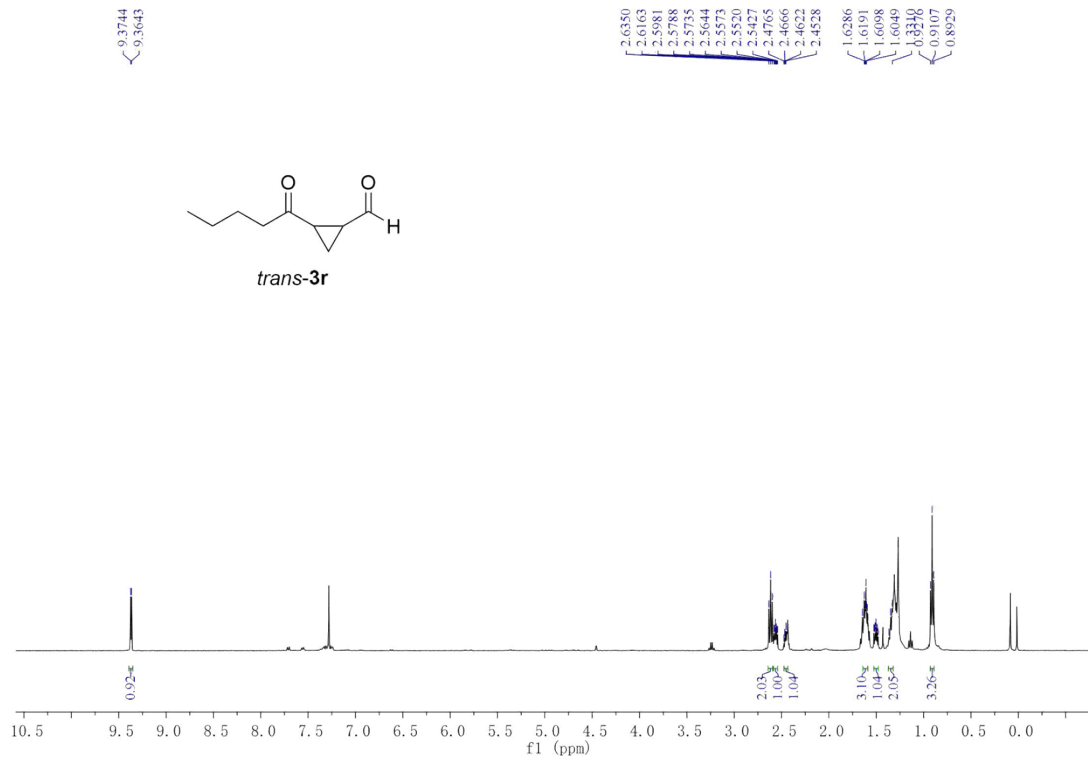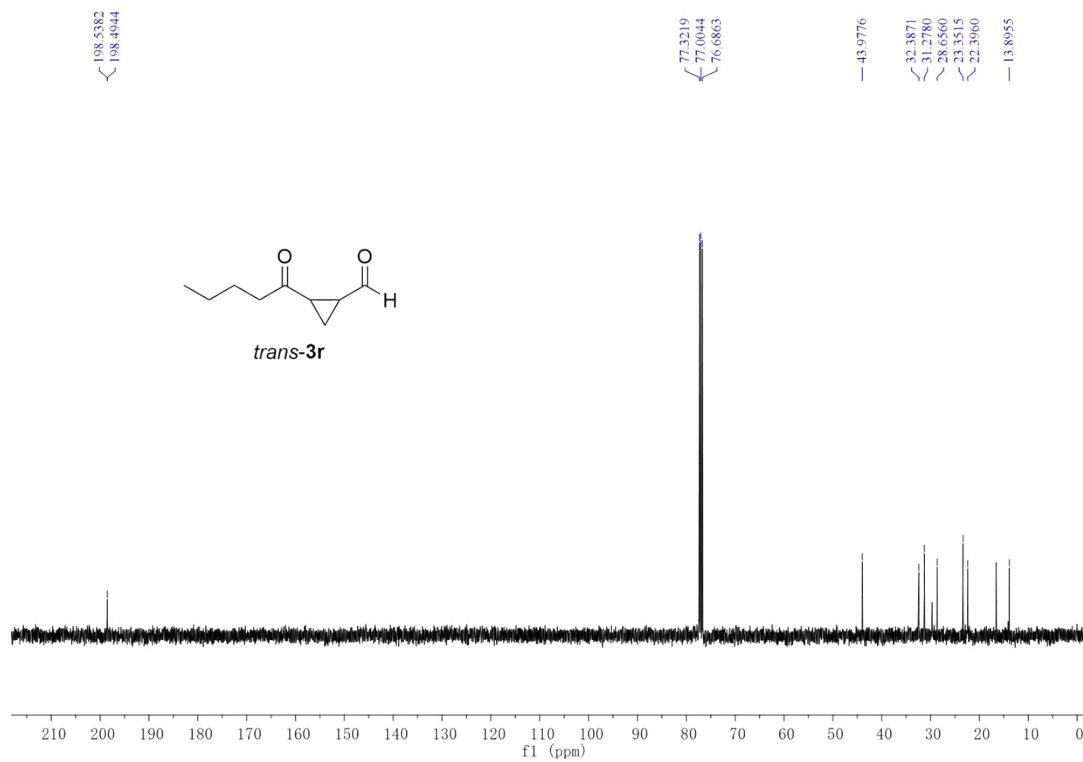

9.2011  
9.1847

2.5980  
2.5781  
2.5751  
2.5680  
2.5575  
2.5544  
2.5484  
2.5377  
2.5313  
2.5119  
2.0468  
0.9485  
1.0337  
1.0170  
1.0019  
1.8980  
1.7626  
1.7565  
1.6802  
1.6884  
1.3256  
1.3152  
1.3088  
1.3089  
1.2941  
1.2865  
1.2635  
1.2570  
1.2324

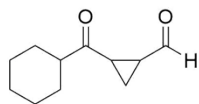

*cis*-**3s**

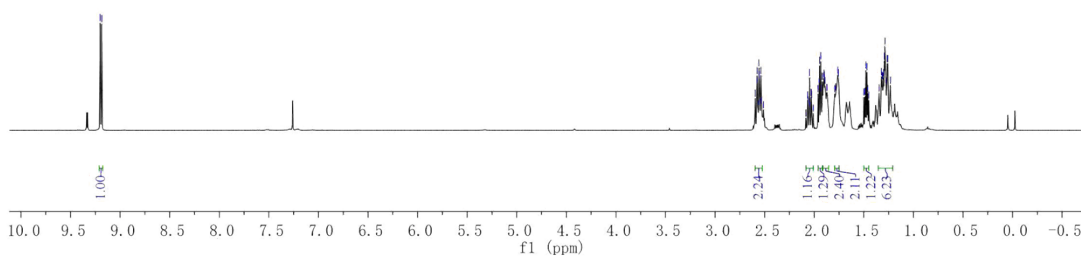

209.9055

200.1508

77.4821  
77.0339  
76.7161

51.7481

32.0803  
28.6315  
28.3013  
28.0249  
25.7239  
25.5615  
25.3952  
13.9874

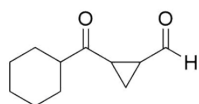

*cis*-**3s**

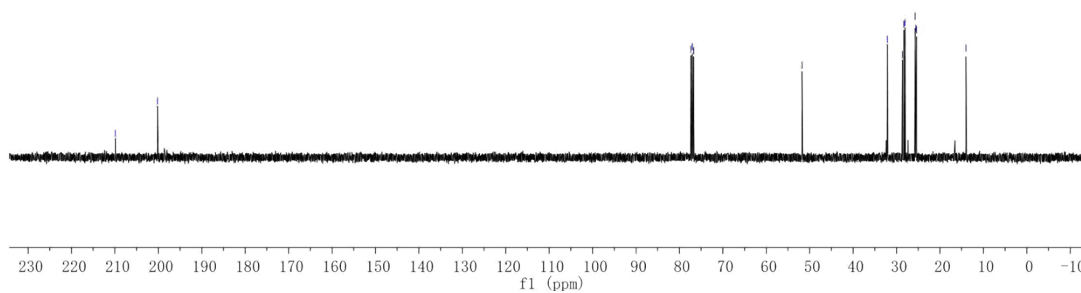

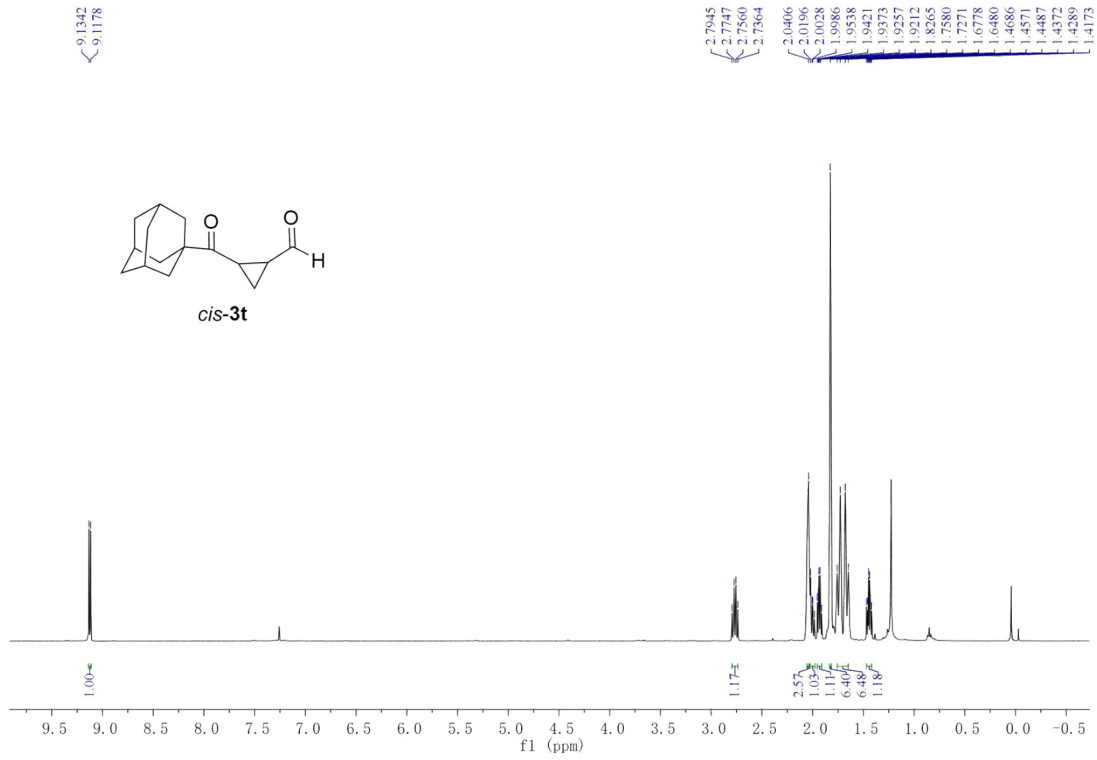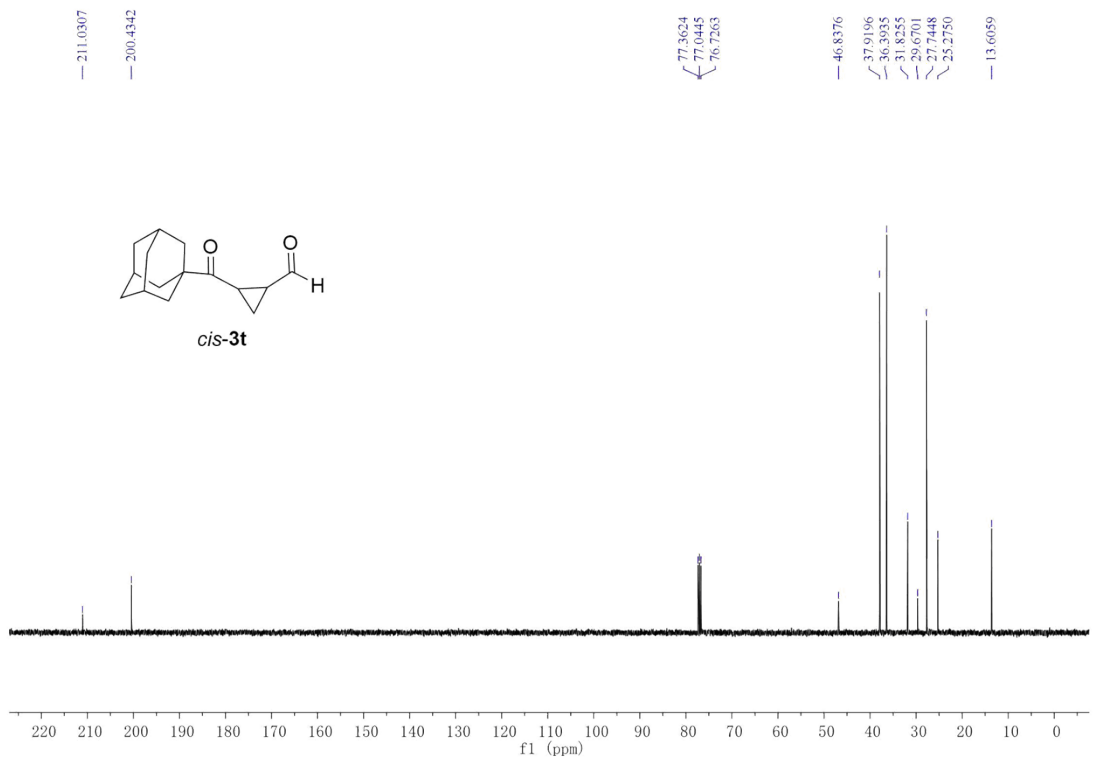

### 3. NMR Spectra of 4

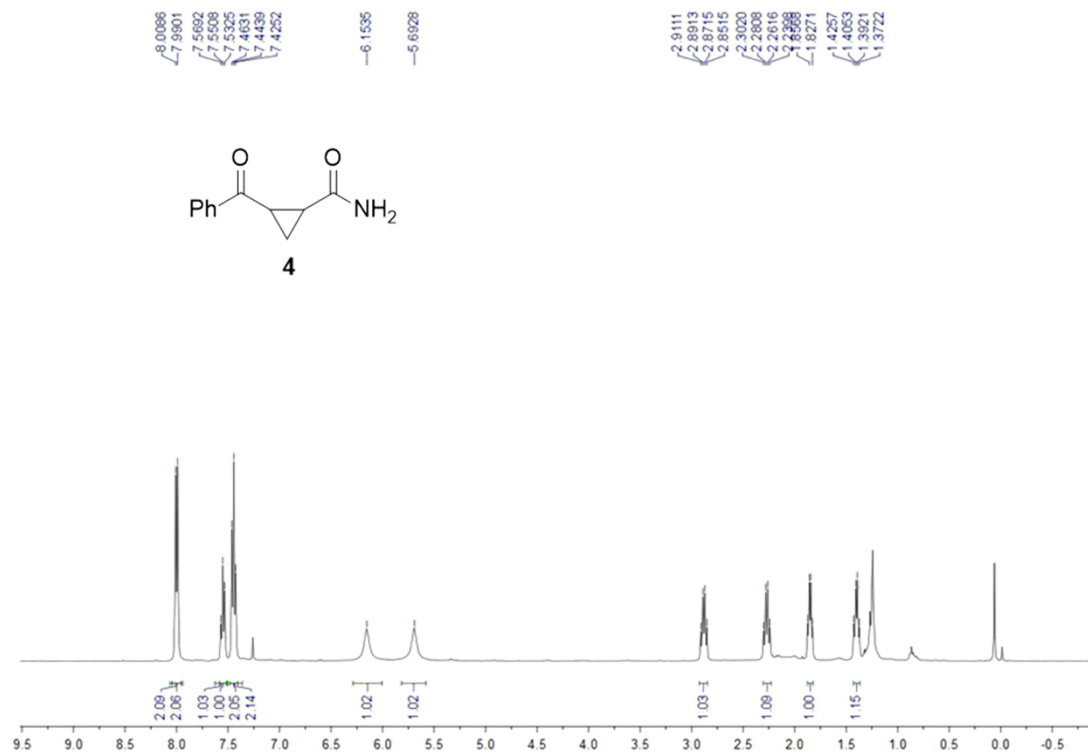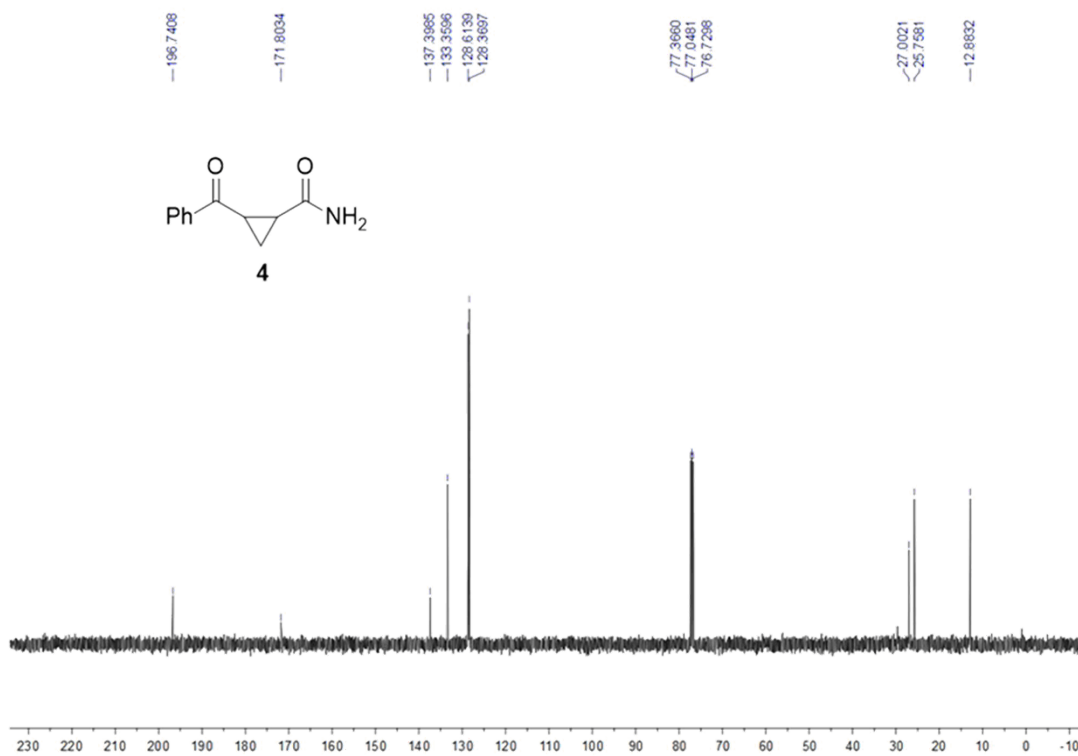

#### 4. NMR Spectra of 5

8.0206  
8.0019  
7.5771  
7.5694  
7.5405  
7.4826  
7.4635  
7.4447

3.8066  
3.7924  
3.7781  
3.7638  
3.5734  
3.5619  
3.5448  
2.6796  
2.6686  
2.6585  
2.6484  
2.6375  
1.5002  
1.4893  
1.4786  
1.4676  
1.4570  
1.0877  
1.0778  
1.0680  
1.0620  
1.0519  
1.0420

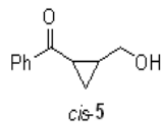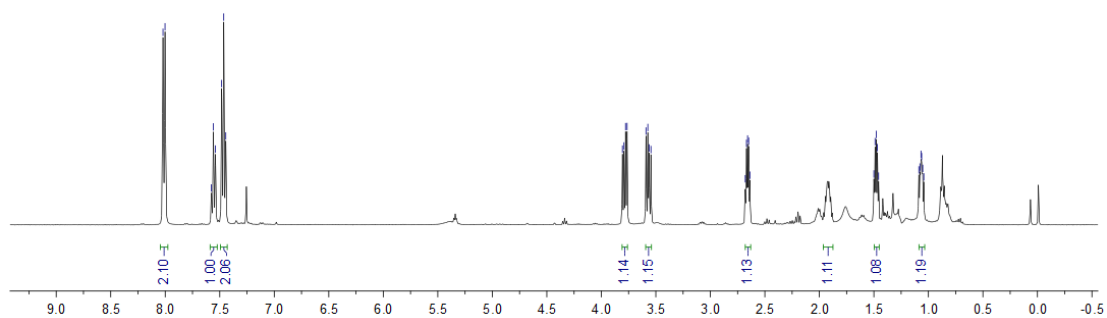

198.4305

137.7448  
132.8575  
128.5163  
128.0712

64.6484

27.5614  
22.6959  
15.6109

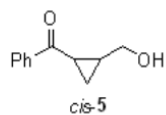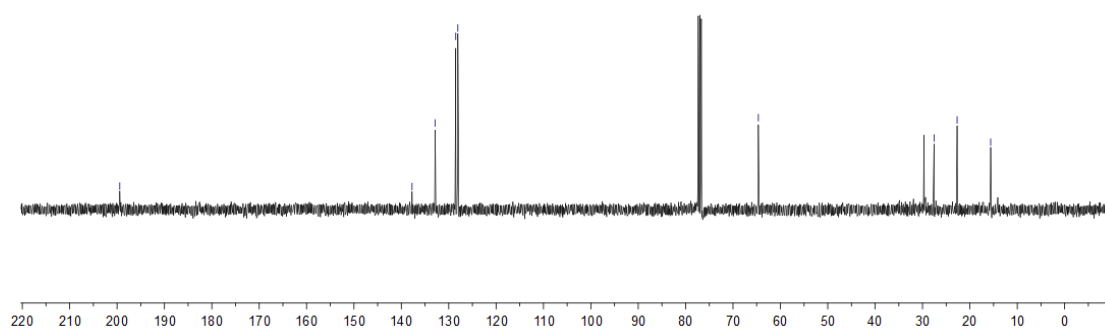

Supplement: d3ob00390f1.pdf [file d3ob00390f1.pdf]
